# Supplementary material for: Hydrogeochemical temporal variations related to the recent volcanic eruption at the Cumbre Vieja Volcano, La Palma, Canary Islands
Source: Frontiers journal article supplement (doi:10.3389/feart.2022.1003890), 2022-10-31
Supplement: Data_Sheet_1.docx [file Data_Sheet_1.docx]

**Appendix 1.-** pH. EC (µS·cm-1), ion content (HCO3-, F-, Cl-. Br-, SO42-, Na+, K+, Ca2+, Mg2+, mg·L-1), partial pressure of CO2 (atm) and

isotopic signature of δ13C-CO2 of Peña Horeb (PH) gallery.

| **Date** | **pH** | **EC** | **HCO3-** | **F-** | **Cl-** | **Br-** | **SO42-** | **Na+** | **K+** | **Ca2+** | **Mg2+** | ***p*CO2** | **δ13C-CO2** |
| --- | --- | --- | --- | --- | --- | --- | --- | --- | --- | --- | --- | --- | --- |
| 18/10/2017 | 7.4 | 1705 | 1244 | 0.61 | 123 | 0.33 | 61 | 195 | 137 | 88 | 83 | 5.6·10-2 | -1.1 |
| 20/10/2017 | 7.3 | 1779 | 1234 | 0.61 | 120 | 0.31 | 60 | 192 | 137 | 89 | 83 | 6.1·10-2 | -6.9 |
| 23/10/2017 | 7.4 | 1766 | 1232 | 0.63 | 122 | 0.33 | 61 | 193 | 122 | 65 | 80 | 5.5·10-2 | -1.8 |
| 25/10/2017 | 7.3 | 1783 | 1236 | 0.62 | 122 | 0.32 | 61 | 193 | 132 | 81 | 82 | 6.8·10-2 | -6.7 |
| 27/10/2017 | 7.2 | 1806 | 1238 | 0.62 | 121 | 0.31 | 60 | 193 | 130 | 78 | 82 | 8.0·10-2 | -7.9 |
| 30/10/2017 | 7.2 | 1795 | 1238 | 0.62 | 123 | 0.33 | 61 | 197 | 143 | 100 | 85 | 9.6·10-2 | -7.5 |
| 01/11/2017 | 7.2 | 1783 | 1234 | 0.60 | 126 | 0.29 | 62 | 197 | 142 | 85 | 84 | 8.5·10-2 | -7.8 |
| 03/11/2017 | 7.2 | 1756 | 1232 | 0.68 | 120 | 0.32 | 61 | 196 | 135 | 79 | 79 | 8.4·10-2 | -8.1 |
| 06/11/2017 | 7.3 | 1741 | 1152 | 0.62 | 117 | 0.30 | 60 | 194 | 138 | 84 | 83 | 6.7·10-2 | -7.1 |
| 08/11/2017 | 7.3 | 1858 | 1205 | 0.60 | 141 | 0.39 | 65 | 208 | 146 | 88 | 87 | 7.8·10-2 | -7.6 |
| 10/11/2017 | 7.3 | 1877 | 1222 | 0.58 | 148 | 0.42 | 67 | 216 | 153 | 90 | 91 | 8.2·10-2 | -7.5 |
| 13/11/2017 | 7.4 | 1852 | 1228 | 0.56 | 148 | 0.40 | 67 | 223 | 160 | 85 | 85 | 6.1·10-2 | -7.8 |
| 15/11/2017 | 7.5 | 1946 | 1217 | 0.62 | 143 | 0.40 | 67 | 216 | 154 | 93 | 93 | 4.8·10-2 | -7.7 |
| 16/11/2017 | 7.4 | 1954 | 1214 | 0.56 | 140 | 0.39 | 66 | 220 | 155 | 91 | 90 | 6.1·10-2 | -6.2 |
| 23/11/2017 | 7.5 | 1881 | 1180 | 0.72 | 129 | 0.34 | 63 | 196 | 138 | 105 | 106 | 5.0·10-2 | -8.1 |
| 30/11/2017 | 7.5 | 1842 | 1225 | 0.62 | 116 | 0.29 | 59 | 210 | 149 | 96 | 96 | 5.0·10-2 | -7.3 |
| 13/12/2017 | 7.6 | 1798 | 1201 | 0.65 | 105 | 0.27 | 56 | 195 | 134 | 77 | 77 | 3.9·10-2 | -6.5 |
| 21/12/2017 | 8.1 | 1714 | 1135 | 0.66 | 117 | 0.30 | 59 | 189 | 135 | 83 | 82 | 1.2·10-2 | -7.1 |
| 28/12/2017 | 7.7 | 1735 | 1195 | 0.65 | 105 | 0.27 | 56 | 198 | 139 | 85 | 85 | 2.9·10-2 | -5.5 |
| 04/01/2018 | 7.4 | 1613 | 1198 | 0.62 | 102 | 0.29 | 57 | 194 | 136 | 82 | 82 | 5.2·10-2 | -6.8 |
| 10/01/2018 | 7.5 | 1615 | 1198 | 0.69 | 99 | 0.28 | 56 | 198 | 136 | 79 | 79 | 5.1·10-2 | -7.0 |
| 15/03/2018 | 7.7 | 1742 | 1132 | 0.78 | 100 | 0.31 | 56 | 186 | 77 | 58 | 124 | 3.2·10-2 | -7.1 |
| 22/03/2018 | 7.5 | 1917 | 1144 | 0.74 | 94 | 0.31 | 52 | 193 | 116 | 73 | 95 | 4.0·10-2 | -6.0 |
| 05/04/2018 | 7.3 | 2220 | 1152 | 0.70 | 102 | 0.33 | 56 | 188 | 77 | 58 | 126 | 7.8·10-2 | -6.7 |
| 12/04/2018 | 7.6 | 1819 | 1152 | 0.71 | 102 | 0.30 | 56 | 189 | 90 | 63 | 115 | 2.9·10-2 | -7.4 |
| 18/04/2018 | 7.5 | 1799 | n.d. | n.d. | n.d. | n.d. | n.d. | n.d. | n.d. | n.d. | n.d. | 3.5·10-2 | -7.4 |
| 26/04/2018 | 7.5 | 1801 | n.d. | n.d. | n.d. | n.d. | n.d. | n.d. | n.d. | n.d. | n.d. | 3.5·10-2 | -7.4 |
| 04/05/2018 | 7.6 | 1658 | 1144 | 0.78 | 105 | 0.33 | 56 | 191 | 77 | 60 | 129 | 3.0·10-2 | -7.2 |
| 10/05/2018 | 7.9 | 1713 | 1161 | 0.73 | 111 | 0.33 | 57 | 191 | 77 | 60 | 129 | 1.6·10-2 | -6.6 |
| 17/05/2018 | 7.3 | 1784 | 1199 | 0.76 | 108 | 0.33 | 57 | 191 | 77 | 60 | 129 | 5.4·10-2 | -7.5 |
| 24/05/2018 | 7.6 | 1746 | 1178 | 0.68 | 117 | 0.36 | 61 | 196 | 81 | 66 | 138 | 2.7·10-2 | -7.2 |
| 31/05/2018 | 8.5 | 1583 | 977 | 0.66 | 128 | 0.31 | 64 | 193 | 79 | 62 | 132 | 4.0·10-3 | -8.5 |
| 07/06/2018 | 7.3 | 1757 | 1159 | 0.67 | 110 | 0.34 | 60 | 193 | 79 | 63 | 133 | 4.5·10-2 | -7.8 |
| 14/06/2018 | 7.4 | 1756 | 1169 | 0.58 | 112 | 0.33 | 62 | 193 | 80 | 61 | 133 | 3.9·10-2 | -8.3 |
| 21/06/2018 | 7.4 | 1814 | 1187 | 0.58 | 113 | 0.36 | 58 | 193 | 79 | 62 | 132 | 3.5·10-2 | -7.5 |
| 28/06/2018 | 7.5 | 1557 | 993 | 0.68 | 97 | 0.27 | 65 | 167 | 72 | 57 | 110 | 2.8·10-2 | -7.2 |
| 05/07/2018 | 7.4 | 1737 | 1180 | 0.65 | 116 | 0.35 | 62 | 184 | 77 | 60 | 125 | 4.4·10-2 | -6.1 |
| 12/07/2018 | 7.4 | 1823 | 1202 | 0.75 | 130 | 0.41 | 67 | 181 | 76 | 59 | 122 | 4.2·10-2 | -7.4 |
| 19/07/2018 | 7.3 | 1935 | 1228 | 0.60 | 125 | 0.39 | 61 | 177 | 75 | 59 | 119 | 4.9·10-2 | -8.0 |
| 26/07/2018 | 7.2 | 2100 | 1341 | 0.56 | 160 | 0.51 | 70 | 233 | 88 | 74 | 163 | 6.9·10-2 | -7.6 |
| 02/08/2018 | 7.2 | 1944 | 1269 | 0.66 | 134 | 0.44 | 66 | 197 | 80 | 64 | 135 | 5.8·10-2 | -8.2 |
| 16/08/2018 | 7.4 | 2110 | 1359 | 0.65 | 177 | 0.58 | 75 | 203 | 81 | 66 | 139 | 4.3·10-2 | -8.0 |
| 23/08/2018 | 7.0 | 1080 | 1290 | 0.66 | 148 | 0.47 | 70 | 211 | 83 | 68 | 146 | 9.7·10-2 | -8.3 |
| 30/08/2018 | 7.3 | 1862 | 1196 | 0.65 | 130 | 0.41 | 67 | 204 | 81 | 66 | 140 | 5.5·10-2 | -8.4 |
| 06/09/2018 | 8.2 | 1723 | 1261 | 0.68 | 104 | 0.32 | 55 | 199 | 82 | 63 | 136 | 8.1·10-3 | -7.4 |
| 13/09/2018 | 7.8 | 1800 | n.d. | n.d. | n.d. | n.d. | n.d. | n.d. | n.d. | n.d. | n.d. | 1.7·10-2 | -8.1 |
| 20/09/2018 | 7.9 | 1754 | 1264 | 0.73 | 124 | 0.39 | 62 | 204 | 83 | 65 | 142 | 1.2·10-2 | -7.5 |
| 25/09/2018 | 7.9 | 1722 | 1251 | 0.68 | 104 | 0.32 | 55 | 202 | 82 | 64 | 139 | 1.2·10-2 | -9.9 |
| 04/10/2018 | 7.6 | 1714 | 1245 | 0.66 | 101 | 0.32 | 54 | 203 | 83 | 65 | 140 | 2.3·10-2 | -8.1 |
| 11/10/2018 | 7.7 | 1709 | 1241 | 0.69 | 97 | 0.33 | 52 | 203 | 83 | 65 | 140 | 2.1·10-2 | -8.5 |
| 18/10/2018 | 7.7 | 1723 | 1251 | 0.73 | 114 | 0.35 | 60 | 202 | 83 | 64 | 140 | 2.5·10-2 | -8.4 |
| 25/10/2018 | 7.7 | 1748 | 1253 | 0.77 | 114 | 0.34 | 59 | 203 | 83 | 64 | 140 | 2.6·10-2 | -8.2 |
| 01/11/2018 | 7.5 | 1722 | 1254 | 0.75 | 110 | 0.34 | 57 | 203 | 83 | 64 | 140 | 3.3·10-2 | -7.8 |
| 08/11/2018 | 7.6 | 1697 | 1225 | 0.79 | 106 | 0.32 | 58 | 191 | 78 | 70 | 138 | 2.4·10-2 | -7.9 |
| 15/11/2018 | 7.6 | 1691 | 1223 | 0.78 | 107 | 0.33 | 58 | 199 | 81 | 66 | 139 | 2.4·10-2 | -8.3 |
| 22/11/2018 | 7.6 | 1714 | 1242 | 0.67 | 98 | 0.31 | 50 | 193 | 78 | 62 | 131 | 2.3·10-2 | -9.1 |
| 29/11/2018 | 7.4 | 1832 | 1218 | 0.68 | 117 | 0.37 | 60 | 194 | 79 | 66 | 136 | 3.8·10-2 | -7.5 |
| 06/12/2018 | 7.4 | 1777 | 1224 | 0.72 | 120 | 0.38 | 61 | 152 | 63 | 83 | 132 | 4.4·10-2 | -8.5 |
| 13/12/2018 | 7.5 | 1779 | 1224 | 0.64 | 121 | 0.38 | 62 | 203 | 81 | 64 | 134 | 4.2·10-2 | -8.9 |
| 20/12/2018 | 7.4 | 1848 | 1230 | 0.67 | 122 | 0.34 | 65 | 183 | 74 | 71 | 134 | 4.2·10-2 | -8.9 |
| 27/12/2018 | 7.4 | 1824 | 1229 | 0.64 | 121 | 0.34 | 64 | 179 | 73 | 73 | 133 | 4.6·10-2 | -9.4 |
| 03/01/2019 | 7.4 | 1820 | 1228 | 0.65 | 121 | 0.35 | 64 | 188 | 76 | 69 | 134 | 4.1·10-2 | -8.7 |
| 10/01/2019 | 7.5 | 1841 | 1230 | 0.66 | 122 | 0.37 | 62 | 200 | 81 | 65 | 137 | 4.1·10-2 | -8.6 |
| 17/01/2019 | 7.6 | 1812 | 1242 | 0.66 | 105 | 0.31 | 53 | 189 | 77 | 69 | 135 | 3.2·10-2 | -8.6 |
| 31/01/2019 | 7.6 | n.d. | n.d. | n.d. | n.d. | n.d. | n.d. | n.d. | n.d. | n.d. | n.d. | 1.2·10-2 | -11.7 |
| 07/02/2019 | 7.2 | 1543 | 1083 | 0.80 | 82 | 0.26 | 52 | 165 | 72 | 56 | 117 | 5.0·10-2 | -9.1 |
| 14/02/2019 | 7.2 | 1588 | 1108 | 0.80 | 83 | 0.27 | 52 | 177 | 74 | 62 | 126 | 6.0·10-2 | n.d. |
| 21/02/2019 | 7.4 | 1557 | 1122 | 0.81 | 81 | 0.24 | 52 | 170 | 74 | 66 | 125 | 4.0·10-2 | -7.3 |
| 28/02/2019 | 7.4 | 1568 | 1158 | 0.72 | 80 | 0.24 | 52 | 169 | 74 | 64 | 126 | 4.2·10-2 | -8.6 |
| 08/03/2019 | 7.3 | 1577 | 1151 | 0.82 | 79 | 0.25 | 51 | 216 | 72 | 55 | 124 | 4.9·10-2 | -8.8 |
| 13/03/2019 | 7.3 | 1608 | 1151 | 0.82 | 79 | 0.25 | 51 | 185 | 73 | 62 | 125 | 4.8·10-2 | -8.0 |
| 21/03/2019 | 7.3 | 1565 | 1151 | 0.81 | 79 | 0.25 | 51 | 167 | 73 | 56 | 117 | 4.6·10-2 | -8.9 |
| 28/03/2019 | 7.0 | 1539 | 1158 | 0.83 | 81 | 0.25 | 52 | 166 | 69 | 53 | 118 | 7.4·10-2 | -8.9 |
| 04/04/2019 | 7.3 | 1600 | 1159 | 0.85 | 91 | 0.23 | 54 | 173 | 69 | 53 | 118 | 4.6·10-2 | -9.0 |
| 11/04/2019 | 7.6 | 1602 | 1129 | 0.83 | 84 | 0.24 | 52 | 172 | 70 | 56 | 119 | 2.6·10-2 | -8.8 |
| 16/04/2019 | 7.6 | 1605 | 1134 | 0.87 | 81 | 0.26 | 52 | 167 | 69 | 54 | 118 | 2.6·10-2 | -8.8 |
| 25/04/2019 | 7.4 | 1603 | 1124 | 0.67 | 70 | 0.22 | 46 | 166 | 69 | 52 | 114 | 3.6·10-2 | -8.3 |
| 02/05/2019 | 7.5 | 1537 | 1128 | 0.85 | 79 | 0.26 | 52 | 168 | 70 | 53 | 117 | 3.4·10-2 | -9.0 |
| 09/05/2019 | 7.3 | 1568 | 1128 | 0.81 | 74 | 0.24 | 49 | 169 | 70 | 53 | 118 | 5.3·10-2 | -9.1 |
| 16/05/2019 | 7.2 | 1610 | 1136 | 0.85 | 78 | 0.25 | 53 | 176 | 76 | 53 | 118 | 5.9·10-2 | -9.6 |
| 27/05/2019 | 7.1 | 1606 | 1146 | 0.71 | 69 | 0.22 | 44 | 178 | 77 | 53 | 117 | 7.1·10-2 | -9.4 |
| 04/06/2019 | 7.1 | 1648 | 1139 | 0.83 | 79 | 0.24 | 51 | 178 | 77 | 53 | 116 | 7.7·10-2 | -8.9 |
| 13/06/2019 | 7.1 | 1324 | 1137 | 0.75 | 69 | 0.21 | 45 | 179 | 77 | 53 | 116 | 7.7·10-2 | -8.8 |
| 20/06/2019 | 7.2 | 1500 | 1132 | 0.84 | 80 | 0.24 | 52 | 177 | 75 | 53 | 116 | 5.8·10-2 | -8.3 |
| 27/06/2019 | 7.1 | 1705 | 1148 | 0.83 | 81 | 0.25 | 52 | 176 | 76 | 53 | 116 | n.d. | -8.1 |
| 04/07/2019 | 7.1 | 1592 | 1147 | 0.82 | 83 | 0.25 | 52 | 177 | 75 | 53 | 116 | 7.1·10-2 | -9.0 |
| 11/07/2019 | 7.1 | 1604 | 1146 | 0.83 | 83 | 0.25 | 52 | 178 | 76 | 53 | 116 | 7.5·10-2 | -9.0 |
| 25/07/2019 | 7.0 | 1637 | 1141 | 0.83 | 82 | 0.25 | 52 | 181 | 77 | 54 | 121 | 8.4·10-2 | -8.4 |
| 01/08/2019 | 7.2 | 1734 | 1178 | 0.81 | 91 | 0.10 | 53 | 186 | 77 | 55 | 123 | 7.2·10-2 | -9.0 |
| 08/08/2019 | 7.1 | 1673 | 1153 | 0.82 | 85 | 0.20 | 52 | 185 | 78 | 56 | 122 | 7.3·10-2 | -9.1 |
| 15/08/2019 | 7.0 | 1621 | 1153 | 0.82 | 86 | 0.18 | 53 | 180 | 76 | 57 | 119 | 8.2·10-2 | -8.9 |
| 22/08/2019 | 7.0 | 1630 | 1152 | 0.61 | 65 | 0.18 | 38 | 184 | 77 | 56 | 121 | 7.8·10-2 | -9.2 |
| 29/08/2019 | 7.0 | 1602 | 1086 | 0.88 | 100 | 0.27 | 56 | 179 | 76 | 54 | 117 | 8.7·10-2 | -8.2 |
| 23/07/2020 | 7.3 | 1619 | 1109 | 0.86 | 75 | 0.22 | 50 | 172 | 73 | 52 | 112 | 5.5·10-2 | -8.4 |
| 30/07/2020 | 7.2 | 1641 | 1108 | 0.86 | 93 | 0.30 | 52 | 182 | 75 | 54 | 112 | 6.7·10-2 | -6.9 |
| 04/08/2020 | 7.2 | 1641 | 1103 | 0.84 | 74 | 0.24 | 50 | 171 | 73 | 54 | 111 | 5.7·10-2 | -8.4 |
| 07/08/2020 | 7.2 | 1640 | 1104 | 0.85 | 73 | 0.23 | 50 | 171 | 73 | 53 | 111 | 5.2·10-2 | -8.3 |
| 13/08/2020 | 7.0 | 1648 | 1059 | 0.85 | 75 | 0.22 | 50 | 170 | 72 | 52 | 111 | 7.6·10-2 | -9.9 |
| 20/08/2020 | 7.1 | 1631 | 1105 | 0.86 | 74 | 0.20 | 50 | 171 | 72 | 52 | 110 | 6.5·10-2 | -8.6 |
| 27/08/2020 | 7.3 | 1635 | 1102 | 0.73 | 74 | 0.23 | 50 | 172 | 72 | 52 | 110 | 4.5·10-2 | -8.4 |
| 03/09/2020 | 7.2 | 1674 | 1022 | 0.85 | 74 | 0.23 | 50 | 170 | 72 | 52 | 110 | 5.7·10-2 | -8.5 |
| 08/09/2020 | 7.1 | 1608 | 1099 | 0.77 | 74 | 0.22 | 50 | 171 | 73 | 52 | 110 | 6.7·10-2 | -8.4 |
| 10/09/2020 | 7.4 | 1795 | 1099 | 0.86 | 74 | 0.22 | 50 | 172 | 73 | 53 | 110 | 3.7·10-2 | -8.8 |
| 17/09/2020 | 7.1 | 1622 | 1100 | 0.87 | 78 | 0.21 | 52 | 172 | 73 | 51 | 111 | 6.7·10-2 | -7.4 |
| 24/09/2020 | 7.2 | 1636 | 1101 | 0.75 | 80 | 0.23 | 52 | 173 | 75 | 52 | 111 | 5.5·10-2 | -8.7 |
| 01/10/2020 | 7.2 | 1590 | 1102 | 0.87 | 79 | 0.21 | 52 | 174 | 74 | 53 | 111 | 5.8·10-2 | -8.5 |
| 08/10/2020 | 7.2 | 1653 | 1096 | 0.88 | 78 | 0.21 | 52 | 174 | 74 | 53 | 112 | 5.8·10-2 | -8.4 |
| 15/10/2020 | 7.2 | 1624 | 1094 | 0.74 | 78 | 0.21 | 52 | 177 | 74 | 54 | 113 | 6.0·10-2 | -8.5 |
| 22/10/2020 | 7.4 | 1599 | 1096 | 0.87 | 78 | 0.21 | 52 | 174 | 74 | 53 | 111 | 3.6·10-2 | -8.4 |
| 29/10/2020 | 7.3 | 1594 | 1096 | 0.85 | 78 | 0.19 | 51 | 173 | 72 | 52 | 111 | 3.9·10-2 | -8.3 |
| 06/11/2020 | 7.4 | 1610 | 1095 | 0.86 | 78 | 0.21 | 52 | 169 | 72 | 53 | 110 | 3.5·10-2 | -8.1 |
| 12/11/2020 | 7.3 | 1630 | 1092 | 0.87 | 78 | 0.20 | 51 | 171 | 72 | 52 | 109 | 3.9·10-2 | -8.4 |
| 19/11/2020 | 7.6 | 1617 | 1096 | 0.87 | 77 | 0.22 | 51 | 170 | 71 | 52 | 110 | 2.3·10-2 | -7.9 |
| 26/11/2020 | 7.3 | 1640 | 1092 | 0.73 | 76 | 0.23 | 52 | 167 | 71 | 50 | 106 | 4.1·10-2 | -8.4 |
| 03/12/2020 | 7.6 | 1589 | 1086 | 0.87 | 76 | 0.20 | 52 | 172 | 73 | 52 | 113 | 2.1·10-2 | -7.2 |
| 10/12/2020 | 7.2 | 1615 | 1077 | 0.86 | 75 | 0.20 | 51 | 171 | 72 | 52 | 112 | 4.7·10-2 | -8.1 |
| 16/12/2020 | 7.5 | 1611 | 1082 | 0.87 | 76 | 0.20 | 52 | 173 | 73 | 52 | 112 | 2.6·10-2 | -7.8 |
| 21/12/2020 | 7.5 | 1595 | 1102 | 0.86 | 75 | 0.19 | 52 | 173 | 76 | 52 | 113 | 2.9·10-2 | -8.4 |
| 28/12/2020 | 7.4 | 1599 | 1106 | 0.86 | 75 | 0.20 | 52 | 173 | 73 | 52 | 113 | 3.9·10-2 | -8.3 |
| 12/01/2021 | 7.3 | 1619 | 1091 | 0.85 | 76 | 0.23 | 52 | 174 | 74 | 52 | 112 | 3.9·10-2 | -8.4 |
| 27/01/2021 | 7.5 | 1609 | 1087 | 0.85 | 77 | 0.23 | 52 | 172 | 73 | 52 | 112 | 3.4·10-2 | -7.2 |
| 12/03/2021 | 7.2 | 1653 | 1104 | 0.73 | 79 | 0.23 | 50 | 174 | 73 | 52 | 112 | 5.9·10-2 | -8.5 |
| 15/03/2021 | 7.3 | 1619 | 1103 | 0.69 | 77 | 0.23 | 50 | 174 | 74 | 52 | 114 | 4.9·10-2 | -8.7 |
| 19/05/2021 | 7.7 | 1644 | 1123 | 0.82 | 82 | 0.24 | 52 | 182 | 78 | 57 | 118 | 2.4·10-2 | -7.3 |
| 02/07/2021 | 7.2 | 1625 | 1116 | 0.86 | 78 | 0.21 | 51 | 169 | 72 | 51 | 109 | n.d. | -8.1 |
| 05/07/2021 | 7.2 | 1624 | 1109 | 0.86 | 79 | 0.21 | 51 | 182 | 73 | 52 | 111 | 5.7·10-2 | -6.9 |
| 20/07/2021 | 7.2 | 1642 | 1112 | 0.70 | 76 | 0.22 | 53 | 190 | 74 | 56 | 120 | 5.6·10-2 | -7.3 |
| 26/08/2021 | 7.2 | 1632 | 1105 | 0.83 | 76 | 0.21 | 53 | 176 | 74 | 54 | 120 | 6.4·10-2 | -8.7 |
| 15/09/2021 | 7.3 | 1631 | 1098 | 0.82 | 74 | 0.19 | 52 | 176 | 74 | 54 | 119 | n.d. | -9.7 |
| 18/09/2021 | 7.2 | 1563 | 1103 | 0.79 | 75 | 0.21 | 53 | 177 | 74 | 54 | 119 | 5.3·10-2 | -6.8 |
| 20/09/2021 | 7.2 | 1627 | 1096 | 0.80 | 72 | 0.19 | 51 | 177 | 75 | 54 | 119 | 5.9·10-2 | -9.6 |
| 22/09/2021 | 7.2 | 1657 | 1094 | 0.83 | 77 | 0.21 | 53 | 182 | 77 | 56 | 121 | 5.9·10-2 | -9.1 |
| 24/09/2021 | 7.1 | 1628 | 1092 | 0.87 | 77 | 0.21 | 54 | 180 | 76 | 54 | 119 | 7.2·10-2 | -8.7 |
| 27/09/2021 | 7.1 | 1617 | 1089 | 0.89 | 76 | 0.22 | 53 | 179 | 75 | 53 | 118 | 7.3·10-2 | -9.2 |
| 29/09/2021 | 7.1 | 1631 | 1097 | 0.86 | 84 | 0.22 | 54 | 182 | 75 | 54 | 120 | 7.0·10-2 | -9.1 |
| 01/10/2021 | 7.1 | 1612 | 1096 | 0.82 | 75 | 0.20 | 53 | 179 | 76 | 55 | 121 | 7.3·10-2 | -9.0 |
| 05/10/2021 | 7.1 | 1601 | 1095 | 0.83 | 75 | 0.21 | 53 | 174 | 72 | 53 | 117 | 8.3·10-2 | -8.5 |
| 08/10/2021 | 7.1 | 1646 | 1099 | 0.67 | 61 | 0.18 | 42 | 174 | 72 | 54 | 119 | 8.5·10-2 | -7.6 |
| 11/10/2021 | 7.3 | 1604 | 1102 | 0.72 | 69 | 0.20 | 45 | 175 | 71 | 53 | 118 | 5.9·10-2 | -8.9 |
| 13/10/2021 | 7.0 | 1653 | 1115 | 0.82 | 69 | 0.19 | 48 | 176 | 72 | 59 | 126 | 1.0·10-1 | -7.9 |
| 15/10/2021 | 7.1 | 1697 | 1119 | 0.87 | 83 | 0.21 | 54 | 178 | 73 | 55 | 121 | 1.4·10-1 | -9.1 |
| 18/10/2021 | 7.1 | 1664 | 1119 | 0.84 | 80 | 0.22 | 54 | 176 | 72 | 54 | 120 | 1.4·10-1 | -9.0 |
| 20/10/2021 | 7.1 | 1693 | 1116 | 0.81 | 79 | 0.20 | 53 | 175 | 71 | 54 | 121 | 1.3·10-1 | -9.2 |
| 22/10/2021 | 7.1 | 1660 | 1117 | 0.93 | 79 | 0.22 | 53 | 176 | 71 | 55 | 120 | 9.1·10-2 | -8.7 |
| 25/10/2021 | 7.1 | 1650 | 1117 | 0.93 | 78 | 0.20 | 53 | 177 | 73 | 57 | 124 | 7.9·10-2 | -8.7 |
| 27/10/2021 | 7.2 | 1652 | 1114 | 0.93 | 78 | 0.18 | 53 | 174 | 71 | 54 | 121 | 7.8·10-2 | -9.0 |
| 29/10/2021 | 7.2 | 1652 | 1137 | 0.92 | 79 | 0.21 | 54 | 175 | 71 | 55 | 121 | 8.0·10-2 | -8.4 |
| 01/11/2021 | 7.1 | 1686 | 1156 | 1.01 | 85 | 0.21 | 55 | 179 | 72 | 55 | 124 | 9.3·10-2 | -8.6 |
| 04/11/2021 | 7.1 | 1745 | 1186 | 0.94 | 91 | 0.23 | 56 | 185 | 75 | 57 | 128 | 8.2·10-2 | -8.5 |
| 06/11/2021 | 7.1 | 1681 | 1150 | 0.88 | 88 | 0.24 | 55 | 184 | 75 | 57 | 128 | 7.7·10-2 | -8.6 |
| 09/11/2021 | 7.1 | 1764 | 1218 | 0.90 | 100 | 0.69 | 59 | 193 | 75 | 60 | 134 | 1.0·10-1 | -8.2 |
| 11/11/2021 | 7.2 | 1781 | 1218 | 0.92 | 102 | 0.80 | 60 | 193 | 75 | 60 | 135 | 8.4·10-2 | -8.7 |
| 15/11/2021 | 7.7 | 1797 | 1236 | 1.06 | 103 | 0.26 | 63 | 190 | 73 | 61 | 134 | 3.0·10-2 | -8.3 |

n.d.: No data.

**Appendix 2.-** pH. EC (µS·cm-1), ion content (HCO3-, F-, Cl-. Br-, SO42-, Na+, K+, Ca2+, Mg2+, mg·L-1), partial pressure of CO2 (atm) and

isotopic signature of δ13C-CO2 of Trasvase Oeste (TO) gallery.

| **Date** | **pH** | **EC** | **HCO3-** | **F-** | **Cl-** | **Br-** | **SO42-** | **Na+** | **K+** | **Ca2+** | **Mg2+** | ***p*CO2** | **δ13C-CO2** |
| --- | --- | --- | --- | --- | --- | --- | --- | --- | --- | --- | --- | --- | --- |
| 18/10/2017 | 7.1 | 415 | 261 | 0.35 | 14 | 0.06 | 4.5 | 44 | 11 | 19 | 18 | 3.5·10-2 | -8.6 |
| 20/10/2017 | 6.5 | 414 | 261 | 0.35 | 16 | 0.07 | 5.1 | 44 | 11 | 19 | 18 | 1.0·10-1 | -9.4 |
| 23/10/2017 | 6.9 | 405 | 261 | 0.34 | 13 | 0.05 | 4.5 | 44 | 11 | 19 | 18 | 7.3·10-2 | -7.1 |
| 25/10/2017 | 7.2 | 406 | 261 | 0.36 | 13 | 0.06 | 4.8 | 44 | 11 | 19 | 18 | 4.8·10-2 | -10.7 |
| 27/10/2017 | 6.9 | 418 | 262 | 0.35 | 13 | 0.05 | 4.8 | 44 | 11 | 19 | 18 | 9.4·10-2 | -6.9 |
| 30/10/2017 | 7.0 | 424 | 262 | 0.36 | 13 | <0.02 | 8.5 | 43 | 11 | 19 | 18 | 6.2·10-2 | -10.3 |
| 01/11/2017 | 7.0 | 418 | 265 | 0.37 | 13 | <0.02 | 8.2 | 45 | 12 | 19 | 18 | 8.6·10-2 | -11.1 |
| 03/11/2017 | 6.9 | 423 | 280 | 0.36 | 13 | <0.02 | 8.6 | 43 | 11 | 20 | 18 | 7.1·10-2 | -8.4 |
| 06/11/2017 | 7.0 | 412 | 249 | 0.34 | 13 | 0.06 | 4.6 | 42 | 11 | 18 | 18 | 4.8·10-2 | -7.7 |
| 08/11/2017 | 7.2 | 408 | 248 | 0.35 | 13 | 0.05 | 4.8 | 41 | 10 | 17 | 18 | 2.8·10-2 | -8.4 |
| 10/11/2017 | 7.2 | 404 | 245 | 0.35 | 13 | 0.06 | 4.7 | 42 | 11 | 17 | 18 | 3.1·10-2 | -7.5 |
| 13/11/2017 | 7.1 | 403 | 245 | 0.35 | 13 | 0.05 | 5.2 | 42 | 11 | 18 | 18 | 3.6·10-2 | -7.5 |
| 15/11/2017 | 6.9 | 386 | 246 | 0.35 | 15 | 0.05 | 4.7 | 42 | 11 | 17 | 18 | 6.5·10-2 | -10.5 |
| 23/11/2017 | 6.9 | 421 | 248 | 0.35 | 14 | 0.06 | 5.0 | 43 | 11 | 23 | 19 | 8.2·10-2 | -11.1 |
| 30/11/2017 | 6.9 | 425 | 261 | 0.37 | 14 | <0.02 | 7.9 | 41 | 10 | 17 | 18 | 7.4·10-2 | -9.5 |
| 14/12/2017 | 7.1 | 418 | 259 | 0.31 | 12 | 0.03 | 4.0 | 43 | 11 | 18 | 17 | 4.0·10-2 | -9.7 |
| 28/12/2017 | 7.0 | 414 | 259 | 0.34 | 13 | <0.02 | 5.7 | 42 | 11 | 18 | 17 | 6.4·10-2 | -10.3 |
| 04/01/2018 | 6.9 | 433 | 264 | 0.34 | 13 | <0.02 | 5.9 | 43 | 11 | 18 | 17 | 7.2·10-2 | -7.5 |
| 10/01/2018 | 7.0 | 408 | 260 | 0.33 | 13 | <0.02 | 5.2 | 43 | 11 | 18 | 17 | 4.6·10-2 | -10.5 |
| 15/01/2018 | 7.1 | 406 | 260 | n.d. | n.d. | n.d. | n.d. | 42 | 11 | 18 | 18 | 5.3·10-2 | -7.3 |
| 15/03/2018 | 7.2 | 430 | n.d. | n.d. | n.d. | n.d. | n.d. | n.d. | n.d. | n.d. | n.d. | 4.0·10-2 | n.d. |
| 22/03/2018 | n.d. | n.d. | n.d. | n.d. | n.d. | n.d. | n.d. | n.d. | n.d. | n.d. | n.d. | 1.9·10-1 | -6.1 |
| 05/04/2018 | 7.0 | 438 | n.d. | n.d. | n.d. | n.d. | n.d. | n.d. | n.d. | n.d. | n.d. | 7.1·10-2 | -10.0 |
| 12/04/2018 | 7.0 | 443 | 305 | 0.36 | 13 | 0.05 | 5.0 | 43 | 13 | 20 | 22 | 6.7·10-2 | -10.9 |
| 18/04/2018 | 7.2 | 396 | 245 | 0.38 | 20 | <0.02 | 8.4 | 44 | 12 | 19 | 21 | 3.3·10-2 | -9.5 |
| 26/04/2018 | 7.3 | 403 | 247 | 0.35 | 14 | 0.07 | 4.8 | 43 | 12 | 19 | 21 | 2.3·10-2 | -7.7 |
| 04/05/2018 | 7.2 | 399 | 244 | 0.38 | 21 | <0.02 | 6.5 | 43 | 12 | 19 | 21 | 4.8·10-2 | -6.4 |
| 10/05/2018 | 7.3 | 399 | 242 | 0.35 | 13 | 0.04 | 5.1 | 45 | 13 | 19 | 21 | 3.8·10-2 | -10.5 |
| 17/05/2018 | 7.1 | 396 | 241 | 0.36 | 16 | 0.04 | 5.5 | 41 | 12 | 19 | 20 | 4.8·10-2 | -9.8 |
| 24/05/2018 | 7.0 | 400 | 242 | 0.35 | 13 | 0.05 | 4.6 | 42 | 12 | 19 | 21 | 5.8·10-2 | -7.1 |
| 31/05/2018 | 7.0 | 386 | 241 | 0.35 | 13 | 0.06 | 4.6 | 43 | 12 | 19 | 21 | 5.0·10-2 | -11.2 |
| 07/06/2018 | 7.2 | 409 | 242 | 0.32 | 12 | 0.05 | 4.3 | 42 | 11 | 19 | 21 | 4.5·10-2 | -9.7 |
| 14/06/2018 | 6.9 | 416 | 252 | 0.32 | 13 | 0.04 | 4.4 | 42 | 11 | 19 | 21 | 7.6·10-2 | -9.8 |
| 25/10/2018 | 6.7 | 391 | 265 | 0.31 | 12 | 0.06 | 4.2 | 41 | 11 | 19 | 21 | 8.5·10-2 | -9.4 |
| 01/11/2018 | 6.5 | 395 | 266 | 0.34 | 13 | 0.07 | 4.7 | 42 | 11 | 19 | 21 | 1.3·10-1 | -11.3 |
| 08/11/2018 | 6.7 | 393 | 263 | 0.34 | 15 | 0.06 | 5.7 | 42 | 11 | 19 | 21 | 8.3·10-2 | -10.8 |
| 15/11/2018 | 6.7 | 388 | 264 | 0.34 | 14 | 0.05 | 5.1 | 42 | 12 | 19 | 21 | 9.9·10-2 | -11.0 |
| 22/11/2018 | 6.3 | 391 | 261 | 0.32 | 13 | 0.03 | 4.6 | 44 | 11 | 19 | 21 | 2.1·10-1 | -11.7 |
| 29/11/2018 | 6.8 | 410 | 251 | n.d. | n.d. | <0.02 | n.d. | 42 | 11 | 19 | 21 | 1.2·10-1 | -9.8 |
| 06/12/2018 | 6.5 | 408 | 253 | 0.34 | 13 | 0.06 | 4.6 | 41 | 11 | 19 | 20 | 1.2·10-1 | -12.4 |
| 13/12/2018 | 6.6 | 408 | 251 | n.d. | n.d. | <0.02 | n.d. | 40 | 11 | 18 | 20 | 1.5·10-1 | -12.2 |
| 20/12/2018 | 6.9 | 411 | 264 | 0.31 | 12 | 0.05 | 4.1 | 45 | 11 | 19 | 21 | 5.7·10-2 | -12.1 |
| 27/12/2018 | 6.3 | 411 | 251 | 0.36 | 13 | 0.05 | 4.7 | 41 | 11 | 19 | 20 | 1.4·10-1 | -12.5 |
| 03/01/2019 | 6.9 | 410 | 251 | 0.35 | 13 | 0.05 | 4.6 | 41 | 11 | 19 | 20 | 5.6·10-2 | -10.9 |
| 10/01/2019 | 6.8 | 416 | 251 | 0.38 | 13 | <0.02 | 8.4 | 40 | 11 | 18 | 20 | 9.8·10-2 | -10.2 |
| 17/01/2019 | 6.9 | 409 | 253 | 0.38 | 13 | <0.02 | 8.0 | 41 | 11 | 19 | 20 | 8.2·10-2 | -12.5 |
| 24/01/2019 | 7.0 | 459 | 252 | 0.38 | 13 | <0.02 | 8.3 | 40 | 11 | 18 | 20 | 8.5·10-2 | -11.6 |
| 31/01/2019 | 7.2 | 405 | 250 | 0.38 | 13 | <0.02 | 7.9 | 41 | 11 | 19 | 20 | 4.1·10-2 | -12.5 |
| 07/02/2019 | 7.1 | 395 | 239 | 0.35 | 12 | 0.06 | 4.9 | 41 | 11 | 19 | 20 | 3.7·10-2 | -12.3 |
| 14/02/2019 | 6.9 | 398 | 274 | 0.35 | 13 | 0.05 | 4.9 | 41 | 11 | 18 | 20 | 5.9·10-2 | -8.2 |
| 21/02/2019 | 7.1 | 407 | 247 | 0.35 | 13 | 0.06 | 5.0 | 41 | 11 | 19 | 20 | 3.8·10-2 | -9.7 |
| 28/02/2019 | 6.6 | 397 | 256 | 0.35 | 13 | 0.06 | 4.9 | 40 | 11 | 19 | 20 | 8.6·10-2 | -11.1 |
| 08/03/2019 | 7.0 | 413 | 258 | 0.34 | 12 | 0.05 | 4.9 | 41 | 11 | 18 | 20 | 5.8·10-2 | -11.8 |
| 13/03/2019 | 7.0 | 421 | 258 | 0.34 | 12 | 0.04 | 4.9 | 41 | 11 | 19 | 20 | 4.9·10-2 | -10.7 |
| 21/03/2019 | 7.1 | 410 | 256 | 0.35 | 12 | 0.06 | 5.0 | 41 | 11 | 19 | 21 | 4.9·10-2 | -12.2 |
| 28/03/2019 | 6.4 | 449 | 259 | 0.35 | 13 | <0.02 | 5.0 | 41 | 11 | 18 | 20 | 1.3·10-1 | -11.5 |
| 04/04/2019 | 6.8 | 403 | 255 | 0.38 | 20 | <0.02 | 8.3 | 41 | 11 | 18 | 20 | 6.8·10-2 | -11.6 |
| 11/04/2019 | 7.4 | 420 | 244 | 0.31 | 12 | 0.04 | 4.4 | 41 | 11 | 18 | 20 | 1.9·10-2 | -12.0 |
| 16/04/2019 | 7.2 | 419 | 254 | 0.35 | 13 | 0.05 | 5.0 | 40 | 11 | 18 | 20 | 4.2·10-2 | n.d. |
| 25/04/2019 | 7.2 | 419 | 246 | 0.32 | 12 | 0.06 | 4.1 | 41 | 11 | 18 | 20 | 3.0·10-2 | -11.6 |
| 02/05/2019 | 7.1 | 408 | 253 | 0.26 | 10 | 0.05 | 3.4 | 40 | 11 | 18 | 20 | 3.5·10-2 | -12.3 |
| 09/05/2019 | 6.9 | 398 | 253 | 0.28 | 11 | <0.02 | 3.7 | 41 | 11 | 18 | 21 | 8.1·10-2 | -11.6 |
| 16/05/2019 | 6.8 | 410 | 254 | 0.35 | 13 | 0.06 | 4.7 | 41 | 11 | 18 | 20 | 5.5·10-2 | -12.3 |
| 27/05/2019 | 7.0 | 402 | 254 | 0.35 | 13 | 0.04 | 5.1 | 42 | 12 | 18 | 20 | 7.0·10-2 | -12.6 |
| 04/06/2019 | 6.6 | 415 | 254 | 0.35 | 13 | 0.05 | 5.1 | 43 | 12 | 18 | 21 | 7.1·10-2 | -12.1 |
| 13/06/2019 | 7.0 | 334 | 258 | 0.35 | 14 | 0.04 | 5.2 | 43 | 12 | 19 | 21 | 6.8·10-2 | n.d. |
| 20/06/2019 | 6.8 | 413 | 258 | 0.35 | 13 | 0.05 | 4.9 | 42 | 11 | 18 | 20 | 1.1·10-1 | -12.5 |
| 27/06/2019 | 6.9 | 440 | 260 | 0.35 | 13 | 0.05 | 4.9 | 42 | 11 | 19 | 20 | 6.5·10-2 | -11.3 |
| 04/07/2019 | 6.7 | 416 | 262 | 0.35 | 15 | 0.05 | 5.0 | 44 | 12 | 19 | 20 | 8.4·10-2 | -11.9 |
| 11/07/2019 | 6.7 | 413 | 260 | 0.35 | 13 | 0.04 | 4.9 | 44 | 12 | 19 | 20 | 1.1·10-1 | -11.3 |
| 25/07/2019 | 6.9 | 416 | 258 | n.d. | n.d. | n.d. | n.d. | 44 | 12 | 19 | 21 | 6.1·10-2 | -11.8 |
| 01/08/2019 | 6.9 | 426 | 261 | 0.35 | 13 | 0.04 | 5.1 | 44 | 12 | 19 | 22 | 7.8·10-2 | -11.9 |
| 08/08/2019 | 6.8 | 426 | 259 | n.d. | n.d. | n.d. | n.d. | n.d. | n.d. | n.d. | n.d. | 8.2·10-2 | -12.3 |
| 15/08/2019 | 6.9 | 417 | 257 | n.d. | n.d. | n.d. | n.d. | n.d. | n.d. | n.d. | n.d. | 6.3·10-2 | -12.3 |
| 22/08/2019 | 6.8 | 423 | 257 | 0.30 | 12 | <0.02 | 4.8 | 43 | 12 | 18 | 21 | 7.5·10-2 | -11.2 |
| 29/08/2019 | 7.0 | 418 | 254 | n.d. | n.d. | n.d. | n.d. | n.d. | n.d. | n.d. | n.d. | 4.8·10-2 | -11.6 |
| 20/11/2019 | 6.9 | 417 | 264 | n.d. | n.d. | n.d. | n.d. | n.d. | n.d. | n.d. | n.d. | 4.6·10-2 | -11.4 |
| 20/09/2021 | 6.9 | 467 | 260 | 0.32 | 19 | 0.06 | 5.4 | 47 | 12 | 20 | 23 | 6.7·10-2 | -12.2 |
| 22/09/2021 | 6.7 | 468 | 267 | 0.37 | 20 | 0.05 | 6.6 | 49 | 12 | 20 | 24 | 8.9·10-2 | -11.8 |
| 24/09/2021 | 6.8 | 445 | 269 | 0.37 | 14 | 0.07 | 5.0 | 45 | 12 | 21 | 23 | 1.0·10-1 | -11.4 |
| 27/09/2021 | 6.9 | 444 | 268 | 0.34 | 14 | 0.06 | 5.0 | 46 | 13 | 20 | 24 | 5.7·10-2 | -11.7 |
| 29/09/2021 | 6.7 | 436 | 266 | 0.32 | 14 | 0.05 | 4.7 | 47 | 13 | 20 | 23 | 1.0·10-1 | -12.3 |
| 01/10/2021 | 7.0 | 435 | 269 | 0.32 | 13 | 0.04 | 4.6 | 45 | 12 | 20 | 23 | 6.9·10-2 | -12.2 |
| 05/10/2021 | 6.7 | 428 | 287 | 0.31 | 13 | 0.04 | 4.6 | 44 | 12 | 23 | 24 | 1.1·10-1 | -12.6 |
| 08/10/2021 | 6.7 | 438 | 287 | 0.27 | 12 | 0.03 | 4.0 | 46 | 12 | 19 | 23 | 1.1·10-1 | -12.4 |
| 11/10/2021 | 6.8 | 442 | 287 | 0.27 | 12 | 0.01 | 4.0 | 44 | 12 | 19 | 22 | 7.0·10-2 | -12.0 |
| 13/10/2021 | 6.7 | 442 | 288 | 0.27 | 11 | <0.02 | 3.9 | 44 | 11 | 19 | 23 | 9.3·10-2 | -11.6 |
| 15/10/2021 | 6.7 | 459 | 288 | 0.36 | 15 | 0.05 | 5.1 | 47 | 13 | 20 | 23 | 9.0·10-2 | -12.6 |
| 18/10/2021 | 6.6 | 461 | 289 | 0.34 | 16 | 0.05 | 5.1 | 54 | 15 | 20 | 24 | 1.0·10-1 | -12.4 |
| 20/10/2021 | 6.6 | 448 | 287 | 0.31 | 13 | 0.04 | 4.5 | 44 | 11 | 19 | 22 | 1.1·10-1 | -12.0 |
| 22/10/2021 | 7.0 | 450 | 285 | 0.34 | 13 | 0.03 | 4.6 | 43 | 11 | 19 | 22 | 6.3·10-2 | -12.0 |
| 25/10/2021 | 6.9 | 442 | 283 | 0.34 | 13 | 0.05 | 4.6 | 43 | 11 | 19 | 22 | 9.8·10-2 | -11.6 |
| 26/10/2021 | 6.9 | 440 | 282 | 0.34 | 13 | 0.04 | 4.5 | 43 | 11 | 19 | 22 | 7.0·10-2 | -11.0 |
| 27/10/2021 | 7.1 | 455 | 298 | 0.37 | 15 | 0.05 | 5.2 | 48 | 14 | 19 | 23 | 4.4·10-2 | -10.9 |
| 28/10/2021 | 6.7 | 432 | 290 | 0.33 | 13 | 0.04 | 4.5 | 43 | 11 | 19 | 22 | 1.3·10-1 | -11.1 |
| 29/10/2021 | 6.5 | 433 | 298 | 0.33 | 13 | 0.04 | 4.5 | 43 | 11 | 19 | 22 | 8.6·10-2 | -11.7 |
| 30/10/2021 | 6.6 | 431 | 291 | 0.33 | 13 | 0.03 | 4.6 | 43 | 11 | 19 | 22 | 1.4·10-1 | -11.7 |
| 31/10/2021 | 6.6 | 433 | 289 | 0.33 | 13 | 0.04 | 4.5 | 43 | 11 | 19 | 22 | 1.4·10-1 | -11.5 |
| 01/11/2021 | 6.7 | 433 | 292 | 0.33 | 13 | 0.04 | 4.5 | 44 | 11 | 19 | 22 | 1.5·10-1 | -11.7 |
| 02/11/2021 | 6.6 | 437 | 291 | 0.33 | 13 | 0.04 | 4.5 | 43 | 11 | 19 | 22 | 1.0·10-1 | -11.7 |
| 03/11/2021 | 6.6 | 429 | 291 | 0.33 | 13 | 0.04 | 4.5 | 43 | 11 | 19 | 22 | 1.1·10-1 | -10.6 |
| 04/11/2021 | 6.6 | 429 | 290 | 0.32 | 13 | 0.04 | 4.5 | 43 | 11 | 19 | 22 | 1.4·10-1 | -11.2 |
| 05/11/2021 | 6.7 | 433 | 291 | 0.33 | 13 | 0.03 | 4.6 | 44 | 11 | 19 | 22 | 1.3·10-1 | -10.3 |
| 06/11/2021 | 6.6 | 430 | 294 | 0.32 | 13 | 0.03 | 4.5 | 44 | 12 | 19 | 23 | 1.5·10-1 | -10.5 |
| 07/11/2021 | 6.6 | 432 | 294 | 0.33 | 13 | 0.04 | 4.5 | 43 | 11 | 19 | 22 | 1.5·10-1 | -10.4 |
| 08/11/2021 | 6.4 | 436 | 322 | 0.33 | 13 | 0.04 | 4.6 | 44 | 11 | 19 | 22 | 1.8·10-1 | -9.7 |
| 09/11/2021 | 6.7 | 427 | 321 | 0.34 | 13 | 0.03 | 4.7 | 45 | 12 | 20 | 23 | 9.9·10-2 | -10.2 |
| 10/11/2021 | 6.7 | 436 | 331 | 0.33 | 13 | 0.05 | 4.6 | 46 | 12 | 20 | 24 | 9.8·10-2 | -11.6 |
| 11/11/2021 | 6.7 | 434 | 337 | 0.33 | 13 | 0.04 | 4.6 | 47 | 12 | 21 | 24 | 1.1·10-1 | -11.5 |
| 12/11/2021 | 6.7 | 432 | 335 | 0.33 | 13 | 0.03 | 4.7 | 47 | 12 | 26 | 28 | 1.2·10-1 | -11.3 |
| 13/11/2021 | 6.7 | 435 | 336 | 0.33 | 13 | 0.04 | 4.6 | 47 | 12 | 26 | 27 | 1.2·10-1 | -10.7 |
| 14/11/2021 | 6.7 | 435 | 336 | 0.33 | 13 | 0.04 | 4.5 | 47 | 12 | 21 | 24 | 1.1·10-1 | -11.2 |
| 15/11/2021 | 6.6 | 437 | 335 | 0.32 | 13 | 0.04 | 4.5 | 47 | 12 | 21 | 24 | 1.0·10-1 | -10.8 |
| 16/11/2021 | 6.7 | 435 | 334 | 0.32 | 13 | 0.04 | 4.5 | 47 | 12 | 25 | 27 | 9.9·10-2 | -11.4 |
| 17/11/2021 | 6.7 | 434 | 332 | 0.33 | 13 | 0.03 | 4.6 | 47 | 12 | 21 | 24 | 1.0·10-1 | -11.1 |
| 18/11/2021 | 6.7 | 435 | 336 | 0.33 | 13 | 0.04 | 4.6 | 44 | 11 | 21 | 23 | 1.0·10-1 | -11.6 |
| 19/11/2021 | 6.7 | 438 | 337 | 0.33 | 13 | 0.04 | 4.6 | 45 | 11 | 21 | 23 | 1.1·10-1 | -11.7 |
| 20/11/2021 | 6.7 | 442 | 332 | 0.34 | 13 | 0.04 | 4.7 | 43 | 11 | 20 | 23 | 7.5·10-2 | -11.3 |
| 21/11/2021 | 6.8 | 444 | 339 | 0.33 | 13 | 0.04 | 4.6 | 44 | 11 | 20 | 23 | 7.4·10-2 | -11.4 |
| 22/11/2021 | 6.8 | 441 | 335 | 0.34 | 14 | 0.04 | 4.8 | 44 | 11 | 20 | 23 | n.d. | -11.5 |
| 23/11/2021 | 6.7 | 437 | 337 | 0.34 | 13 | 0.04 | 4.6 | 44 | 11 | 20 | 23 | 1.0·10-1 | -11.4 |
| 24/11/2021 | 6.7 | 444 | 336 | 0.33 | 13 | 0.04 | 4.7 | 44 | 11 | 20 | 23 | 1.4·10-1 | -11.4 |
| 25/11/2021 | 6.6 | 440 | 267 | 0.34 | 13 | 0.07 | 4.6 | 44 | 11 | 20 | 23 | 1.0·10-1 | -11.4 |
| 26/11/2021 | 6.7 | 448 | 255 | 0.32 | 13 | <0.02 | 4.5 | 42 | 11 | 19 | 22 | 6.2·10-2 | -11.4 |
| 27/11/2021 | 6.8 | 450 | 263 | 0.32 | 13 | 0.03 | 4.5 | 43 | 11 | 20 | 22 | 8.0·10-2 | n.d. |
| 28/11/2021 | 6.8 | 447 | 262 | 0.32 | 13 | 0.04 | 4.5 | 43 | 11 | 20 | 22 | n.d. | -11.4 |
| 29/11/2021 | 6.8 | 442 | 261 | 0.33 | 13 | 0.04 | 4.5 | 43 | 11 | 19 | 22 | 6.8·10-2 | -11.4 |
| 30/11/2021 | 6.8 | 449 | 260 | 0.33 | 13 | 0.04 | 4.5 | 43 | 11 | 20 | 22 | 8.0·10-2 | -11.3 |
| 01/12/2021 | 6.8 | 447 | 262 | 0.33 | 13 | 0.04 | 4.5 | 43 | 11 | 19 | 22 | 8.5·10-2 | -9.7 |
| 02/12/2021 | 6.8 | 446 | 263 | 0.33 | 13 | 0.04 | 4.4 | 43 | 11 | 19 | 22 | 8.9·10-2 | -11.2 |
| 03/12/2021 | 6.8 | 459 | 249 | 0.34 | 13 | 0.04 | 4.6 | 42 | 11 | 19 | 22 | 5.3·10-2 | -11.1 |
| 04/12/2021 | 6.9 | 448 | 264 | 0.33 | 13 | 0.04 | 4.6 | 43 | 11 | 20 | 23 | 6.6·10-2 | -10.8 |
| 05/12/2021 | 6.7 | 451 | 265 | 0.33 | 13 | 0.03 | 4.7 | 43 | 11 | 19 | 22 | 9.0·10-2 | -7.8 |
| 06/12/2021 | 6.8 | 450 | 266 | 0.33 | 13 | 0.03 | 4.6 | 43 | 11 | 19 | 22 | 9.7·10-2 | -11.2 |
| 07/12/2021 | 6.8 | 452 | 264 | 0.45 | 13 | 0.04 | 5.0 | 43 | 11 | 20 | 22 | 7.2·10-2 | -9.1 |
| 08/12/2021 | 6.6 | 444 | 265 | 0.33 | 13 | 0.06 | 4.7 | 43 | 11 | 20 | 22 | 9.8·10-2 | -10.9 |
| 09/12/2021 | 6.6 | 448 | 264 | 0.32 | 13 | 0.03 | 4.5 | 43 | 11 | 20 | 22 | 1.0·10-1 | -11.0 |
| 10/12/2021 | 6.6 | 448 | 265 | 0.34 | 13 | 0.05 | 4.6 | 43 | 11 | 21 | 23 | 1.2·10-1 | -11.2 |
| 11/12/2021 | 6.5 | 448 | 266 | 0.33 | 13 | 0.04 | 4.7 | 43 | 11 | 19 | 22 | 9.8·10-2 | -10.9 |
| 12/12/2021 | 6.6 | 450 | 266 | 0.33 | 13 | 0.04 | 4.7 | 43 | 11 | 20 | 22 | 9.1·10-2 | -11.4 |
| 13/12/2021 | 6.7 | 456 | 267 | 0.33 | 13 | 0.04 | 4.7 | 43 | 11 | 20 | 22 | 8.6·10-2 | -11.3 |
| 14/12/2021 | 6.7 | 448 | 263 | 0.33 | 13 | 0.04 | 4.6 | 42 | 11 | 19 | 22 | 1.0·10-1 | -11.2 |
| 16/12/2021 | 6.6 | 443 | 263 | 0.33 | 13 | 0.03 | 4.5 | 42 | 11 | 19 | 22 | 9.1·10-2 | -11.1 |
| 17/12/2021 | 6.7 | 448 | 264 | 0.33 | 13 | 0.03 | 4.6 | 43 | 11 | 19 | 22 | 8.7·10-2 | -10.9 |
| 18/12/2021 | 6.7 | 450 | 259 | 0.34 | 13 | 0.04 | 4.6 | 42 | 11 | 20 | 22 | 8.7·10-2 | -10.6 |
| 19/12/2021 | 6.7 | 446 | 261 | 0.34 | 13 | 0.05 | 4.6 | 43 | 11 | 19 | 22 | 1.0·10-1 | -11.3 |
| 20/12/2021 | 6.7 | 423 | 263 | 0.34 | 13 | 0.04 | 4.6 | 43 | 11 | 19 | 22 | 9.4·10-2 | -11.3 |
| 21/12/2021 | 6.8 | 444 | 261 | 0.34 | 13 | 0.04 | 4.7 | 43 | 11 | 19 | 22 | 6.6·10-2 | -11.2 |
| 22/12/2021 | 6.6 | 424 | 249 | 0.33 | 13 | 0.03 | 4.6 | 42 | 11 | 19 | 22 | 9.0·10-2 | -10.9 |
| 23/12/2021 | 6.7 | 427 | 254 | 0.33 | 13 | 0.03 | 4.6 | 43 | 11 | 19 | 22 | 7.2·10-2 | -10.4 |
| 24/12/2021 | 6.7 | 427 | 254 | 0.33 | 13 | 0.04 | 4.6 | 43 | 11 | 19 | 22 | 8.0·10-2 | -10.7 |
| 25/12/2021 | 6.6 | 430 | 253 | 0.33 | 13 | 0.04 | 4.5 | 43 | 11 | 19 | 22 | 1.0·10-1 | -11.5 |
| 26/12/2021 | 6.7 | 428 | 254 | 0.33 | 13 | 0.03 | 4.6 | 43 | 11 | 19 | 22 | 9.7·10-2 | -11.4 |
| 27/12/2021 | 6.7 | 426 | 255 | 0.33 | 13 | 0.04 | 4.6 | 42 | 11 | 19 | 22 | 9.8·10-2 | -11.7 |
| 28/12/2021 | 6.6 | 430 | 255 | 0.33 | 13 | <0.02 | 4.6 | 43 | 11 | 19 | 22 | 1.0·10-1 | -11.4 |
| 30/12/2021 | 6.8 | 414 | 252 | 0.33 | 13 | <0.02 | 4.5 | 43 | 11 | 19 | 22 | 7.7·10-2 | -11.7 |
| 31/12/2021 | 6.8 | 429 | 252 | 0.34 | 13 | <0.02 | 4.6 | 43 | 11 | 19 | 22 | 7.0·10-2 | -11.6 |
| 01/01/2022 | 6.9 | 429 | 256 | 0.34 | 13 | <0.02 | 4.6 | 43 | 11 | 20 | 22 | 5.8·10-2 | -11.2 |
| 02/01/2022 | 6.8 | 430 | 254 | 0.45 | 13 | <0.02 | 4.7 | 43 | 11 | 20 | 22 | 5.6·10-2 | -11.3 |
| 03/01/2022 | 6.8 | 431 | 254 | 0.34 | 13 | <0.02 | 4.6 | 43 | 11 | 20 | 23 | 7.8·10-2 | -10.4 |
| 04/01/2022 | 6.8 | 429 | 247 | 0.34 | 13 | <0.02 | 4.6 | 43 | 11 | 20 | 22 | 7.7·10-2 | -11.4 |
| 05/01/2022 | 6.8 | 430 | 239 | 0.34 | 13 | <0.02 | 4.6 | 43 | 11 | 20 | 23 | 7.5·10-2 | -10.7 |
| 07/01/2022 | 6.8 | 430 | 256 | 0.33 | 13 | <0.02 | 4.6 | 43 | 11 | 20 | 22 | 6.8·10-2 | -11.1 |
| 08/01/2022 | 6.8 | 431 | 254 | 0.34 | 13 | <0.02 | 4.6 | 43 | 11 | 20 | 22 | 6.4·10-2 | -10.6 |
| 09/01/2022 | 6.9 | 429 | 253 | 0.34 | 13 | <0.02 | 4.6 | 43 | 11 | 20 | 23 | 6.9·10-2 | -10.7 |
| 10/01/2022 | 6.8 | 429 | 252 | 0.33 | 13 | <0.02 | 4.7 | 44 | 11 | 20 | 23 | 7.9·10-2 | -11.6 |
| 11/01/2022 | 6.8 | 432 | 259 | 0.34 | 13 | <0.02 | 4.6 | 43 | 11 | 20 | 23 | 6.7·10-2 | -11.1 |
| 12/01/2022 | 6.8 | 431 | 257 | 0.34 | 13 | <0.02 | 4.6 | 44 | 11 | 20 | 23 | 6.7·10-2 | -10.6 |
| 13/01/2022 | 6.8 | 432 | 257 | 0.33 | 13 | <0.02 | 4.6 | 43 | 11 | 19 | 22 | 8.7·10-2 | -11.0 |
| 14/01/2022 | 7.0 | 431 | 257 | 0.33 | 13 | <0.02 | 4.6 | 43 | 11 | 19 | 22 | 5.7·10-2 | -10.4 |
| 15/01/2022 | 6.9 | 430 | 256 | 0.33 | 13 | <0.02 | 4.6 | 43 | 11 | 19 | 23 | 7.2·10-2 | -11.0 |
| 16/01/2022 | 6.9 | 430 | 256 | 0.34 | 13 | <0.02 | 4.6 | 43 | 11 | 20 | 22 | 6.4·10-2 | -10.9 |
| 17/01/2022 | 6.8 | 430 | 256 | 0.33 | 13 | <0.02 | 4.7 | 43 | 11 | 19 | 22 | 6.5·10-2 | -11.2 |
| 18/01/2022 | 6.8 | 425 | 256 | 0.33 | 13 | <0.02 | 4.6 | 42 | 11 | 19 | 22 | 9.2·10-2 | -11.1 |
| 19/01/2022 | 6.8 | 428 | 258 | 0.33 | 13 | <0.02 | 4.6 | 43 | 11 | 19 | 22 | 7.9·10-2 | -11.0 |
| 21/01/2022 | 6.6 | 436 | 256 | 0.33 | 13 | 0.05 | 4.6 | 42 | 11 | 19 | 22 | 1.0·10-1 | -10.8 |
| 22/01/2022 | 6.9 | 429 | 257 | 0.33 | 13 | 0.05 | 4.5 | 42 | 11 | 19 | 22 | 6.4·10-2 | -10.7 |
| 23/01/2022 | 6.8 | 433 | 257 | 0.33 | 13 | 0.03 | 4.6 | 42 | 11 | 19 | 22 | 7.9·10-2 | -11.1 |
| 24/01/2022 | 6.8 | 432 | 259 | 0.33 | 13 | 0.05 | 4.6 | 43 | 11 | 19 | 22 | 7.9·10-2 | -10.6 |
| 26/01/2022 | 6.8 | 428 | 255 | 0.33 | 13 | 0.03 | 4.6 | 42 | 11 | 19 | 22 | 8.4·10-2 | -9.6 |
| 28/01/2022 | 6.8 | 431 | 255 | 0.33 | 13 | 0.04 | 4.7 | 42 | 11 | 19 | 22 | 7.1·10-2 | -9.9 |
| 30/01/2022 | 6.8 | 429 | 254 | 0.33 | 13 | 0.04 | 4.6 | 42 | 11 | 19 | 22 | 7.5·10-2 | -11.2 |
| 31/01/2022 | 6.8 | 428 | 254 | 0.33 | 13 | 0.06 | 4.6 | 42 | 11 | 19 | 22 | 7.9·10-2 | -11.3 |
| 01/02/2022 | 6.7 | 436 | 254 | 0.32 | 13 | 0.05 | 4.4 | 43 | 12 | 18 | 22 | 7.1·10-2 | -11.6 |
| 02/02/2022 | 6.8 | 437 | 255 | 0.32 | 13 | 0.03 | 4.4 | 43 | 12 | 18 | 22 | 6.6·10-2 | -11.5 |
| 03/02/2022 | 6.8 | 441 | 254 | 0.32 | 13 | 0.03 | 4.4 | 43 | 12 | 18 | 22 | 7.2·10-2 | -11.9 |
| 04/02/2022 | 6.8 | 439 | 254 | 0.33 | 13 | 0.04 | 4.5 | 43 | 12 | 18 | 22 | 7.9·10-2 | -11.6 |
| 05/02/2022 | 6.9 | 437 | 253 | 0.33 | 13 | 0.05 | 4.4 | 43 | 12 | 18 | 22 | 7.2·10-2 | -11.2 |
| 06/02/2022 | 6.9 | 436 | 252 | 0.33 | 13 | 0.04 | 4.4 | 43 | 12 | 18 | 22 | 5.0·10-2 | -11.5 |
| 07/02/2022 | 6.9 | 437 | 251 | 0.32 | 12 | 0.04 | 4.3 | 43 | 12 | 18 | 22 | 5.4·10-2 | -11.0 |
| 08/02/2022 | 6.9 | 436 | 254 | 0.33 | 13 | 0.03 | 4.4 | 43 | 12 | 18 | 22 | 5.9·10-2 | -11.5 |
| 09/02/2022 | 6.8 | 437 | 251 | 0.33 | 13 | 0.04 | 4.5 | 43 | 12 | 18 | 22 | 6.6·10-2 | -11.8 |
| 10/02/2022 | 6.9 | 436 | 251 | 0.33 | 13 | 0.05 | 4.6 | 43 | 12 | 18 | 22 | 6.2·10-2 | n.d. |
| 11/02/2022 | 6.9 | 439 | n.d. | n.d. | n.d. | n.d. | n.d. | 44 | 12 | 18 | 22 | 5.9·10-2 | -11.5 |
| 14/02/2022 | n.d. | n.d. | n.d. | n.d. | n.d. | n.d. | n.d. | 44 | 12 | 18 | 22 | 2.4·10-1 | -11.5 |
| 15/02/2022 | 6.9 | 439 | 255 | 0.33 | 13 | 0.04 | 4.5 | 44 | 12 | 18 | 22 | 5.7·10-2 | -11.1 |
| 16/02/2022 | 6.7 | 415 | 254 | 0.34 | 15 | 0.04 | 5.1 | 44 | 12 | 18 | 22 | 8.1·10-2 | -11.1 |
| 17/02/2022 | 6.9 | 428 | 254 | 0.34 | 14 | 0.04 | 5.0 | 43 | 12 | 18 | 22 | 6.3·10-2 | -11.4 |
| 18/02/2022 | 6.9 | 429 | 254 | 0.34 | 14 | 0.04 | 5.0 | 43 | 12 | 18 | 22 | 6.8·10-2 | -11.4 |
| 21/02/2022 | 6.8 | 422 | 255 | 0.34 | 14 | 0.04 | 4.9 | 43 | 12 | 18 | 22 | 7.2·10-2 | -11.7 |
| 22/02/2022 | 6.9 | 435 | 254 | 0.34 | 14 | 0.04 | 5.0 | 43 | 12 | 18 | 22 | 7.2·10-2 | -11.4 |
| 23/02/2022 | 6.7 | 425 | 253 | 0.34 | 14 | 0.04 | 5.0 | 43 | 12 | 18 | 22 | 7.4·10-2 | -10.7 |
| 02/03/2022 | 6.8 | 425 | 253 | 0.34 | 15 | 0.04 | 5.1 | 43 | 12 | 18 | 22 | 7.3·10-2 | -8.9 |
| 04/03/2022 | 6.8 | 430 | 253 | 0.34 | 15 | 0.04 | 5.1 | 43 | 12 | 18 | 22 | 6.8·10-2 | -11.4 |
| 09/03/2022 | 6.7 | 423 | 255 | 0.34 | 15 | 0.04 | 5.1 | 43 | 12 | 18 | 22 | 7.9·10-2 | n.d. |
| 11/03/2022 | 6.8 | 413 | 255 | 0.34 | 14 | 0.04 | 5.1 | 43 | 12 | 18 | 22 | 7.5·10-2 | -10.1 |
| 14/03/2022 | 6.6 | 414 | 255 | 0.34 | 16 | <0.02 | 5.4 | 44 | 13 | 18 | 22 | 9.9·10-2 | -11.7 |
| 16/03/2022 | 6.7 | 416 | 254 | 0.34 | 15 | <0.02 | 5.0 | 43 | 12 | 18 | 22 | 7.6·10-2 | -11.1 |
| 18/03/2022 | 6.7 | 413 | 254 | 0.33 | 14 | <0.02 | 4.9 | 42 | 12 | 18 | 22 | 6.7·10-2 | -10.5 |
| 21/03/2022 | 6.6 | 409 | 251 | 0.34 | 15 | 0.04 | 5.1 | 43 | 12 | 18 | 22 | 7.2·10-2 | -10.7 |
| 23/03/2022 | 6.7 | 382 | 250 | 0.34 | 15 | 0.05 | 5.1 | 42 | 12 | 17 | 21 | 7.5·10-2 | -11.1 |
| 25/03/2022 | 6.7 | 402 | 254 | 0.34 | 14 | 0.04 | 5.0 | 42 | 12 | 18 | 21 | 5.6·10-2 | -10.8 |
| 28/03/2022 | 6.6 | 388 | 244 | 0.33 | 14 | 0.04 | 5.0 | 42 | 11 | 17 | 21 | 7.0·10-2 | -8.6 |
| 30/03/2022 | 6.8 | 384 | 244 | 0.34 | 14 | 0.05 | 5.0 | 42 | 11 | 17 | 21 | 7.2·10-2 | -9.4 |

n.d.: No data.

**Appendix 3.-** pH. EC (µS·cm-1), ion content (HCO3-, F-, Cl-. Br-, SO42-, Na+, K+, Ca2+, Mg2+, mg·L-1), partial pressure of CO2 (atm) and

isotopic signature of δ13C-CO2 of Las Salinas (SAL) well.

| **Date** | **pH** | **EC** | **HCO3-** | **F-** | **Cl-** | **Br-** | **SO42-** | **Na+** | **K+** | **Ca2+** | **Mg2+** | ***p*CO2** | **δ13C-CO2** |
| --- | --- | --- | --- | --- | --- | --- | --- | --- | --- | --- | --- | --- | --- |
| 18/10/2017 | 6.3 | 40900 | 613 | n.d. | 18900 | 60 | 2595 | 10438 | 400 | 564 | 1413 | 1.5·10-1 | -3.1 |
| 20/10/2017 | 6.3 | 40600 | 612 | n.d. | 18378 | 66 | 2421 | 10486 | 409 | 581 | 1423 | 1.6·10-1 | 0.2 |
| 23/10/2017 | 6.4 | 40000 | 630 | n.d. | 18457 | 64 | 2444 | 10383 | 405 | 588 | 1440 | 9.1·10-2 | -1.8 |
| 25/10/2017 | 6.5 | 40200 | 636 | n.d. | 19300 | 71 | 2554 | 10264 | 402 | 567 | 1421 | 1.2·10-1 | -3.8 |
| 27/10/2017 | 6.6 | 40100 | 633 | n.d. | 18355 | 64 | 2428 | 10339 | 400 | 473 | 1314 | 6.7·10-2 | -3.6 |
| 30/10/2017 | 6.6 | 39900 | 651 | n.d. | 19267 | 63 | 2456 | 10556 | 407 | 601 | 1461 | 1.8·10-1 | n.d. |
| 01/11/2017 | 6.7 | 39600 | 649 | n.d. | 18298 | 62 | 2432 | 10393 | 408 | 608 | 1459 | 7.6·10-2 | -3.2 |
| 03/11/2017 | 6.7 | 39500 | 643 | n.d. | 18194 | 64 | 2418 | 10328 | 402 | 563 | 1396 | 7.8·10-2 | n.d. |
| 06/11/2017 | 6.3 | 40500 | 644 | n.d. | 18328 | 65 | 2431 | 10303 | 405 | 589 | 1426 | 1.1·10-1 | -3.5 |
| 08/11/2017 | 6.5 | 39500 | 636 | n.d. | 18340 | 61 | 2433 | 10388 | 405 | 611 | 1442 | 9.1·10-2 | -4.7 |
| 10/11/2017 | 6.5 | 39400 | 636 | n.d. | 18268 | 63 | 2427 | 10340 | 399 | 562 | 1392 | 1.1·10-1 | -4.3 |
| 13/11/2017 | 6.5 | 40900 | 619 | n.d. | 18261 | 64 | 2423 | 10359 | 405 | 590 | 1432 | 1.1·10-1 | -4.0 |
| 15/11/2017 | 6.6 | 41100 | 610 | n.d. | 18531 | 63 | 2459 | 10442 | 404 | 590 | 1447 | 9.1·10-2 | -4.8 |
| 16/11/2017 | 6.6 | 41000 | 608 | n.d. | 18152 | 64 | 2395 | 10500 | 414 | 596 | 1463 | 7.7·10-2 | -4.2 |
| 21/11/2017 | 6.5 | 41000 | 612 | n.d. | 18131 | 64 | 2401 | 10350 | 407 | 541 | 1463 | 1.6·10-1 | -6.0 |
| 23/11/2017 | 6.5 | 40900 | 610 | n.d. | 18307 | 63 | 2440 | 10178 | 395 | 628 | 1445 | 7.4·10-2 | -5.1 |
| 28/11/2017 | 6.6 | 42100 | 616 | n.d. | 18294 | 63 | 2430 | 10440 | 403 | 641 | 1487 | 2.6·10-1 | 1.3 |
| 30/11/2017 | 6.6 | 38400 | 529 | n.d. | 16031 | 54 | 2098 | 9483 | 371 | 556 | 1336 | 2.0·10-1 | -4.0 |
| 05/12/2017 | 6.6 | 42300 | 577 | n.d. | 18249 | 62 | 2422 | 10103 | 394 | 576 | 1411 | 2.2·10-1 | -4.3 |
| 12/12/2017 | 6.6 | 42200 | 581 | n.d. | 19846 | 71 | 2611 | 9797 | 376 | 470 | 1267 | 2.4·10-1 | -2.1 |
| 14/12/2017 | 6.6 | 42300 | 575 | n.d. | 18407 | 66 | 2424 | 10326 | 398 | 576 | 1430 | 2.3·10-1 | -1.4 |
| 19/12/2017 | 7.0 | 41100 | 544 | n.d. | 18884 | 70 | 2482 | 10949 | 428 | 625 | 1541 | 3.1·10-2 | 1.4 |
| 21/12/2017 | 6.8 | 40700 | 552 | n.d. | 19127 | 70 | 2548 | 10863 | 417 | 499 | 1361 | 4.9·10-2 | 1.9 |
| 26/12/2017 | 6.9 | 40100 | 532 | n.d. | 18567 | 65 | 2447 | 10266 | 396 | 482 | 1306 | 6.2·10-2 | -4.4 |
| 28/12/2017 | 6.9 | 40400 | 536 | n.d. | 18471 | 64 | 2446 | 10397 | 400 | 553 | 1471 | 6.5·10-2 | -5.2 |
| 02/01/2018 | 6.8 | 40800 | 524 | n.d. | 18887 | 63 | 2501 | 10225 | 392 | 430 | 1261 | 2.9·10-2 | -4.2 |
| 04/01/2018 | 6.9 | 40900 | 514 | n.d. | 18806 | 66 | 2485 | 10208 | 394 | 425 | 1242 | 3.8·10-2 | -2.8 |
| 08/01/2018 | 7.0 | 40400 | 488 | n.d. | 18636 | 65 | 2474 | 10458 | 398 | 440 | 1263 | 5.5·10-2 | -3.5 |
| 10/01/2018 | 6.9 | 40700 | 485 | n.d. | 18894 | 64 | 2510 | 10292 | 396 | 419 | 1244 | 5.2·10-2 | -4.2 |
| 15/01/2018 | 6.9 | 41200 | 511 | n.d. | 18845 | 64 | 2489 | 10838 | 415 | 394 | 1255 | n.d. | -2.3 |
| 22/01/2018 | 6.9 | 41300 | 478 | n.d. | 20527 | 74 | 2717 | 10387 | 398 | 452 | 1281 | 3.7·10-2 | -5.1 |
| 31/01/2018 | 7.5 | 39500 | n.d. | n.d. | n.d. | n.d. | n.d. | n.d. | n.d. | n.d. | n.d. | n.d. | n.d. |
| 05/02/2018 | 7.1 | 43100 | 430 | n.d. | 19196 | 68 | 2533 | 11026 | 405 | 409 | 1285 | 2.9·10-2 | n.d. |
| 15/02/2018 | 6.8 | 42500 | 423 | n.d. | 19123 | 68 | 2519 | 11280 | 418 | 414 | 1307 | 6.0·10-2 | -4.2 |
| 22/02/2018 | 6.8 | 43300 | 420 | n.d. | 19139 | 68 | 2522 | 10584 | 406 | 447 | 1280 | 6.8·10-2 | -0.8 |
| 01/03/2018 | 6.9 | 43100 | 391 | n.d. | 19023 | 67 | 2518 | 10674 | 403 | 453 | 1323 | 2.3·10-2 | 0.0 |
| 07/03/2018 | 6.7 | 43400 | 343 | n.d. | 19193 | 72 | 2538 | 10493 | 405 | 413 | 1250 | 4.6·10-2 | -3.9 |
| 12/03/2018 | 6.6 | 44800 | n.d. | n.d. | 18985 | 65 | 2507 | 10666 | 412 | 431 | 1297 | 2.5·10-2 | -0.6 |
| 15/03/2018 | 6.8 | 45000 | n.d. | n.d. | 19486 | 62 | 2668 | 10586 | 396 | 407 | 1261 | 4.7·10-2 | -1.6 |
| 22/03/2018 | 6.8 | 47300 | 363 | n.d. | 19485 | 63 | 2667 | 10624 | 401 | 429 | 1274 | 1.6·10-2 | -3.8 |
| 27/03/2018 | 6.9 | 47000 | 350 | n.d. | 19451 | 63 | 2652 | 10621 | 395 | 452 | 1284 | 1.5·10-2 | -0.9 |
| 03/04/2018 | 6.8 | 38200 | n.d. | n.d. | 19222 | 67 | 2521 | 10677 | 403 | 418 | 1276 | 1.0·10-1 | -2.3 |
| 05/04/2018 | 6.9 | 38100 | n.d. | n.d. | 19338 | 68 | 2543 | 11075 | 410 | 402 | 1275 | 5.6·10-2 | -4.4 |
| 09/04/2018 | 6.9 | 38300 | n.d. | n.d. | 19463 | 64 | 2655 | 10838 | 411 | 448 | 1330 | 3.9·10-2 | -1.4 |
| 18/04/2018 | 7.1 | 44700 | 346 | n.d. | 19513 | 63 | 2647 | 10769 | 409 | 436 | 1291 | 3.7·10-2 | -2.9 |
| 24/04/2018 | 7.0 | 42200 | 348 | n.d. | 19456 | 71 | 2551 | 10864 | 407 | 420 | 1301 | 4.8·10-2 | -0.6 |
| 26/04/2018 | 7.0 | 45000 | 363 | n.d. | 19582 | 63 | 2663 | 10796 | 410 | 434 | 1302 | 4.4·10-2 | -4.6 |
| 30/04/2018 | 6.9 | 45500 | 350 | n.d. | 19349 | 74 | 2551 | 11075 | 409 | 462 | 1373 | 4.8·10-2 | -1.4 |
| 04/05/2018 | 6.9 | 44900 | 344 | n.d. | 19628 | 62 | 2683 | 11110 | 414 | 417 | 1321 | 1.8·10-2 | -3.0 |
| 08/05/2018 | 6.9 | 41800 | 355 | n.d. | 19657 | 63 | 2675 | 11053 | 403 | 434 | 1299 | 6.3·10-2 | n.d. |
| 10/05/2018 | 6.8 | 44800 | 365 | n.d. | 19468 | 62 | 2681 | 11234 | 416 | 416 | 1318 | 7.4·10-2 | n.d. |
| 15/05/2018 | 6.8 | 41800 | 382 | n.d. | 19826 | 63 | 2744 | 11149 | 508 | 359 | 1304 | 5.6·10-2 | -4.2 |
| 17/05/2018 | 6.8 | 41400 | 372 | n.d. | 19493 | 62 | 2688 | 11261 | 411 | 403 | 1294 | 5.5·10-2 | -4.7 |
| 22/05/2018 | 6.9 | 41500 | 352 | n.d. | 19502 | 62 | 2698 | 11165 | 409 | 432 | 1311 | 3.8·10-2 | -0.7 |
| 24/05/2018 | 6.9 | 41000 | 344 | n.d. | 19617 | 62 | 2693 | 11190 | 420 | 423 | 1339 | 2.5·10-2 | 1.2 |
| 29/05/2018 | 6.6 | 41200 | 409 | n.d. | 19447 | 62 | 2682 | 11219 | 418 | 1199 | 961 | 8.7·10-2 | -6.2 |
| 31/05/2018 | 6.7 | 41100 | 402 | n.d. | 19735 | 64 | 2721 | 11119 | 421 | 1171 | 959 | 5.8·10-2 | -5.2 |
| 05/06/2018 | 6.8 | 41900 | 387 | n.d. | 19449 | 63 | 2694 | 11121 | 409 | 428 | 1339 | 8.6·10-2 | -5.0 |
| 07/06/2018 | 6.7 | 42000 | 388 | n.d. | 18482 | 59 | 2549 | 11371 | 420 | 419 | 1345 | 5.3·10-2 | -3.8 |
| 12/06/2018 | 6.6 | 41800 | 420 | n.d. | 20563 | 64 | 2756 | 11110 | 410 | 423 | 1323 | 5.6·10-2 | -4.8 |
| 14/06/2018 | 6.6 | 42000 | 444 | n.d. | 19862 | 65 | 2748 | 11300 | 421 | 423 | 1335 | 8.7·10-2 | -6.1 |
| 19/06/2018 | 6.7 | 42000 | 427 | n.d. | 19877 | 64 | 2751 | 11298 | 417 | 415 | 1336 | 6.2·10-2 | -2.5 |
| 21/06/2018 | 6.6 | 41900 | 428 | n.d. | 19609 | 65 | 2706 | 11116 | 412 | 409 | 1299 | 6.8·10-2 | -5.1 |
| 26/06/2018 | 6.5 | 41800 | 457 | n.d. | 19770 | 65 | 2731 | 11107 | 413 | 426 | 1306 | 5.7·10-2 | -0.2 |
| 28/06/2018 | 6.5 | 41400 | 474 | n.d. | 19454 | 63 | 2687 | 11245 | 414 | 422 | 1324 | 5.3·10-2 | -3.4 |
| 03/07/2018 | 6.6 | 42000 | 487 | n.d. | 19503 | 63 | 2696 | 10755 | 401 | 398 | 1258 | 6.7·10-2 | 0.1 |
| 05/07/2018 | 6.6 | 41700 | 498 | n.d. | 19710 | 64 | 2723 | 11092 | 428 | 403 | 1241 | 9.0·10-2 | -3.6 |
| 10/07/2018 | 6.4 | 41700 | 506 | n.d. | 19480 | 62 | 2694 | 11121 | 423 | 404 | 1291 | 1.6·10-1 | -3.9 |
| 12/07/2018 | 6.5 | 41700 | 501 | n.d. | 19459 | 63 | 2686 | 11151 | 427 | 405 | 1286 | 1.3·10-1 | -0.5 |
| 17/07/2018 | 6.5 | 42600 | 493 | n.d. | 19550 | 63 | 2701 | 11012 | 420 | 405 | 1318 | 6.0·10-2 | -3.9 |
| 19/07/2018 | 6.5 | 42600 | 484 | n.d. | 18956 | 62 | 2615 | 11201 | 416 | 419 | 1316 | 4.5·10-2 | -4.1 |
| 24/07/2018 | 6.3 | 41700 | 533 | n.d. | 18676 | 60 | 2572 | 11001 | 402 | 402 | 1284 | 7.6·10-2 | -3.3 |
| 26/07/2018 | 6.4 | 40500 | 548 | n.d. | 18230 | 57 | 2506 | 11145 | 411 | 411 | 1298 | 1.0·10-1 | -4.7 |
| 31/07/2018 | 6.4 | 41900 | 538 | n.d. | 18380 | 59 | 2522 | 10936 | 406 | 410 | 1283 | 6.9·10-2 | -4.0 |
| 02/08/2018 | 7.2 | 42000 | 559 | n.d. | 19079 | 61 | 2637 | 10934 | 417 | 408 | 1261 | 3.7·10-2 | -5.0 |
| 07/08/2018 | 6.4 | 42100 | 536 | n.d. | 18563 | 59 | 2555 | 11005 | 411 | 409 | 1281 | 1.1·10-1 | -4.9 |
| 09/08/2018 | 6.5 | 42200 | 573 | n.d. | 18937 | 61 | 2609 | 10959 | 411 | 409 | 1275 | 1.3·10-1 | -3.8 |
| 14/08/2018 | 6.6 | 42300 | 571 | n.d. | 18735 | 60 | 2595 | 10911 | 407 | 398 | 1259 | 7.9·10-2 | -4.2 |
| 16/08/2018 | 6.4 | 41600 | 547 | n.d. | 17459 | 57 | 2404 | 10958 | 410 | 405 | 1272 | 1.2·10-1 | -4.7 |
| 21/08/2018 | 6.2 | 42100 | 582 | n.d. | 18092 | 58 | 2495 | 10763 | 401 | 394 | 1256 | 1.3·10-1 | -4.5 |
| 23/08/2018 | 6.5 | 42000 | 587 | n.d. | 19030 | 60 | 2636 | 10971 | 427 | 396 | 1269 | 1.0·10-1 | -5.1 |
| 28/08/2018 | 6.4 | 41900 | 597 | n.d. | 19691 | 64 | 2726 | 10931 | 422 | 411 | 1265 | 1.5·10-1 | -5.3 |
| 30/08/2018 | 6.4 | 42000 | 602 | n.d. | 20985 | 68 | 2891 | 11030 | 432 | 402 | 1277 | n.d. | -5.7 |
| 04/09/2018 | 6.9 | 40500 | 602 | n.d. | 18934 | 61 | 2618 | 10836 | 415 | 392 | 1245 | 6.4·10-2 | -5.4 |
| 06/09/2018 | 7.0 | 40400 | 610 | n.d. | 18566 | 66 | 2466 | 10806 | 423 | 396 | 1242 | 3.8·10-2 | -5.3 |
| 11/09/2018 | 6.5 | 41700 | 580 | n.d. | 18934 | 61 | 2618 | 10779 | 413 | 398 | 1274 | 7.5·10-2 | n.d. |
| 13/09/2018 | 6.5 | 41700 | 577 | n.d. | 18954 | 60 | 2624 | 10854 | 419 | 396 | 1261 | 7.9·10-2 | -5.4 |
| 18/09/2018 | 7.0 | 40400 | 611 | n.d. | 18885 | 64 | 2506 | 10863 | 420 | 395 | 1262 | n.d. | -5.1 |
| 20/09/2018 | 7.1 | 40300 | 630 | n.d. | 18597 | 63 | 2451 | 10772 | 413 | 383 | 1232 | 2.6·10-2 | -5.1 |
| 24/09/2018 | 6.9 | 40200 | 626 | n.d. | 18601 | 64 | 2467 | 10762 | 416 | 412 | 1263 | 4.6·10-2 | -5.8 |
| 02/10/2018 | 6.7 | 40500 | 618 | n.d. | 18348 | 66 | 2426 | 10849 | 423 | 391 | 1257 | 5.3·10-2 | -5.7 |
| 04/10/2018 | 6.8 | 40300 | 633 | n.d. | 18282 | 63 | 2421 | 10806 | 406 | 416 | 1277 | 6.1·10-2 | -5.5 |
| 09/10/2018 | 6.7 | 40600 | 606 | n.d. | 18402 | 61 | 2438 | 10877 | 406 | 401 | 1263 | 4.5·10-2 | -5.6 |
| 11/10/2018 | 6.7 | 40400 | 607 | n.d. | 18267 | 64 | 2415 | 10902 | 408 | 394 | 1260 | 8.0·10-2 | -5.4 |
| 16/10/2018 | 6.7 | 40200 | 620 | n.d. | 18315 | 64 | 2426 | 10916 | 404 | 402 | 1260 | 1.0·10-1 | -5.5 |
| 18/10/2018 | 6.7 | 40200 | 631 | n.d. | 18284 | 63 | 2433 | 10830 | 411 | 404 | 1264 | 9.2·10-2 | -5.7 |
| 23/10/2018 | 6.5 | 40200 | 645 | n.d. | 18260 | 62 | 2419 | 10882 | 407 | 413 | 1269 | 1.2·10-1 | -5.2 |
| 25/10/2018 | 6.6 | 40200 | 623 | n.d. | 18279 | 68 | 2439 | 10708 | 415 | 398 | 1236 | 1.1·10-1 | -5.5 |
| 30/10/2018 | 6.6 | 40400 | 618 | n.d. | 18450 | 62 | 2437 | 10903 | 411 | 403 | 1278 | 8.8·10-2 | -5.3 |
| 02/11/2018 | 6.6 | 40300 | 619 | n.d. | 18544 | 64 | 2462 | 10758 | 399 | 396 | 1255 | 1.6·10-1 | -5.5 |
| 06/11/2018 | 6.4 | 40200 | 621 | n.d. | 18388 | 68 | 2450 | 11131 | 420 | 413 | 1297 | n.d. | -5.6 |
| 08/11/2018 | 6.5 | 40400 | 612 | n.d. | 18572 | 65 | 2445 | 10709 | 414 | 385 | 1246 | 1.3·10-1 | -5.5 |
| 13/11/2018 | 6.4 | 40300 | 604 | n.d. | 18187 | 64 | 2421 | 10895 | 409 | 406 | 1279 | 8.8·10-2 | n.d. |
| 15/11/2018 | 6.4 | 40300 | 617 | n.d. | 18426 | 65 | 2458 | 10925 | 413 | 413 | 1277 | 1.1·10-1 | n.d. |
| 20/11/2018 | 6.5 | 40300 | 606 | n.d. | 18290 | 60 | 2423 | 11059 | 420 | 392 | 1262 | 8.0·10-2 | n.d. |
| 22/11/2018 | 6.4 | 40300 | 587 | n.d. | 18376 | 62 | 2449 | 10934 | 410 | 425 | 1269 | 8.6·10-2 | n.d. |
| 27/11/2018 | 6.6 | 40900 | 550 | n.d. | 18430 | 66 | 2448 | 10878 | 418 | 393 | 1251 | 1.1·10-1 | n.d. |
| 29/11/2018 | 6.5 | 41900 | 554 | n.d. | 18616 | 64 | 2472 | 10790 | 421 | 380 | 1248 | 9.9·10-2 | -5.7 |
| 04/12/2018 | 6.4 | 40700 | 555 | n.d. | 18762 | 64 | 2466 | 11086 | 429 | 403 | 1281 | 8.6·10-2 | -5.9 |
| 06/12/2018 | 6.5 | 41200 | 549 | n.d. | 18531 | 64 | 2455 | 10891 | 422 | 396 | 1258 | 1.0·10-1 | n.d. |
| 11/12/2018 | 6.5 | 41200 | 559 | n.d. | 18618 | 63 | 2476 | 11114 | 426 | 395 | 1287 | 7.7·10-2 | -7.0 |
| 13/12/2018 | 6.5 | 41100 | 543 | n.d. | 18598 | 68 | 2461 | 10724 | 414 | 390 | 1224 | 1.6·10-1 | -5.9 |
| 18/12/2018 | 6.4 | 42100 | 567 | n.d. | 18582 | 65 | 2464 | 10795 | 424 | 400 | 1253 | 9.0·10-2 | -6.3 |
| 20/12/2018 | 6.5 | 42000 | 557 | n.d. | 19190 | 70 | 2516 | 10978 | 409 | 411 | 1285 | 9.7·10-2 | -5.1 |
| 27/12/2018 | 6.4 | 41900 | 548 | n.d. | 18583 | 67 | 2475 | 11103 | 409 | 423 | 1291 | 8.9·10-2 | -6.0 |
| 03/01/2019 | 6.2 | 41200 | 542 | n.d. | 18785 | 67 | 2485 | 10721 | 416 | 390 | 1244 | 1.4·10-1 | -6.2 |
| 09/01/2019 | 6.2 | 41200 | 531 | n.d. | 19095 | 65 | 2448 | 10211 | 404 | 382 | 1211 | 1.3·10-1 | -5.6 |
| 10/01/2019 | 6.3 | 41300 | 525 | n.d. | 19364 | 66 | 2483 | 10502 | 410 | 386 | 1208 | 1.5·10-1 | -5.2 |
| 15/01/2019 | 6.3 | 40300 | 524 | n.d. | 19177 | 64 | 2455 | 10478 | 410 | 386 | 1221 | 1.4·10-1 | n.d. |
| 17/01/2019 | 6.5 | 40200 | 521 | n.d. | 19205 | 64 | 2451 | 10908 | 406 | 425 | 1276 | 1.5·10-1 | n.d. |
| 22/01/2019 | 6.5 | 43500 | 463 | n.d. | 19194 | 64 | 2457 | 10838 | 415 | 394 | 1255 | 6.2·10-2 | -5.9 |
| 24/01/2019 | 6.7 | 43900 | 437 | n.d. | 19409 | 63 | 2484 | 10879 | 420 | 387 | 1250 | 7.1·10-2 | -3.4 |
| 29/01/2019 | 6.8 | 39900 | 467 | n.d. | 19276 | 64 | 2465 | 10755 | 401 | 398 | 1258 | n.d. | -12.4 |
| 31/01/2019 | 6.8 | 39700 | 463 | n.d. | 19484 | 66 | 2485 | 10923 | 406 | 415 | 1290 | 1.3·10-1 | -5.5 |
| 05/02/2019 | 6.5 | 40200 | 413 | n.d. | 19051 | 64 | 2429 | 11114 | 426 | 395 | 1287 | 7.5·10-2 | n.d. |
| 07/02/2019 | 6.5 | 40000 | 400 | n.d. | 18763 | 63 | 2390 | 11096 | 422 | 397 | 1281 | 8.3·10-2 | n.d. |
| 12/02/2019 | 6.4 | 39600 | 413 | n.d. | 19580 | 67 | 2508 | 10963 | 412 | 424 | 1302 | 7.0·10-2 | n.d. |
| 14/02/2019 | 6.4 | 39600 | 479 | n.d. | 19936 | 67 | 2553 | 11058 | 420 | 405 | 1290 | 7.4·10-2 | n.d. |
| 19/02/2019 | 6.5 | 39900 | 431 | n.d. | 19488 | 65 | 2492 | 11147 | 419 | 437 | 1332 | 5.5·10-2 | n.d. |
| 21/02/2019 | 6.6 | 39900 | 422 | n.d. | 19707 | 65 | 2513 | 11083 | 420 | 435 | 1321 | 6.8·10-2 | n.d. |
| 25/02/2019 | 6.8 | 39400 | 438 | n.d. | 19257 | 67 | 2672 | 11096 | 420 | 426 | 1314 | 4.7·10-2 | -6.0 |
| 28/02/2019 | 6.7 | 39500 | 436 | n.d. | 19322 | 68 | 2683 | 10988 | 404 | 412 | 1293 | 6.8·10-2 | -5.7 |
| 08/03/2019 | 6.7 | 39800 | 433 | n.d. | 19759 | 68 | 2743 | 11056 | 414 | 424 | 1309 | 6.9·10-2 | -5.5 |
| 13/03/2019 | 6.7 | 40500 | 396 | n.d. | 19428 | 67 | 2695 | 11003 | 412 | 406 | 1286 | 4.3·10-2 | -6.0 |
| 19/03/2019 | 6.7 | 39400 | 382 | n.d. | 19503 | 68 | 2707 | 11278 | 426 | 423 | 1338 | 4.6·10-2 | -5.3 |
| 21/03/2019 | 6.8 | 39600 | 375 | n.d. | 19563 | 68 | 2715 | 11001 | 410 | 410 | 1288 | 5.8·10-2 | n.d. |
| 25/03/2019 | 7.0 | 40400 | 354 | n.d. | 19498 | 68 | 2705 | 10979 | 406 | 406 | 1284 | 3.9·10-2 | -6.0 |
| 28/03/2019 | 7.0 | 40300 | 347 | n.d. | 19521 | 68 | 2709 | 11117 | 415 | 428 | 1318 | 3.6·10-2 | -5.6 |
| 02/04/2019 | 6.6 | 39900 | 374 | n.d. | 19201 | 66 | 2663 | 11107 | 412 | 428 | 1328 | 5.8·10-2 | -0.5 |
| 04/04/2019 | 6.6 | 39600 | 389 | n.d. | 19337 | 65 | 2686 | 11166 | 413 | 429 | 1324 | 5.4·10-2 | -6.2 |
| 09/04/2019 | 6.9 | 39100 | 390 | n.d. | 19276 | 68 | 2680 | 11137 | 409 | 420 | 1309 | 2.6·10-2 | -6.2 |
| 11/04/2019 | 7.0 | 40300 | n.d. | n.d. | 19336 | 67 | 2677 | 11137 | 412 | 426 | 1320 | 2.5·10-2 | -6.1 |
| 16/04/2019 | 7.1 | 40400 | 392 | n.d. | 19324 | 66 | 2664 | 11022 | 409 | 424 | 1297 | 2.0·10-2 | n.d. |
| 23/04/2019 | 7.0 | 40300 | 376 | n.d. | 19306 | 67 | 2677 | 11105 | 412 | 418 | 1305 | 3.1·10-2 | n.d. |
| 25/04/2019 | 6.9 | 40700 | 385 | n.d. | 19337 | 67 | 2687 | 11178 | 407 | 430 | 1307 | 4.2·10-2 | -5.7 |
| 30/04/2019 | 6.8 | 40500 | 395 | n.d. | 19317 | 67 | 2667 | 11197 | 415 | 430 | 1313 | 5.9·10-2 | -6.1 |
| 02/05/2019 | 6.9 | 38400 | 396 | n.d. | 18845 | 65 | 2597 | 11221 | 419 | 432 | 1336 | 4.7·10-2 | -6.0 |
| 07/05/2019 | 6.6 | 40100 | 406 | n.d. | 19431 | 68 | 2673 | 11149 | 409 | 422 | 1315 | 7.8·10-2 | n.d. |
| 09/05/2019 | 6.4 | 40100 | 403 | n.d. | 19238 | 69 | 2655 | 11165 | 417 | 417 | 1317 | 1.1·10-1 | n.d. |
| 14/05/2019 | 6.2 | 40400 | 426 | n.d. | 19171 | 67 | 2642 | 11194 | 410 | 416 | 1295 | 1.1·10-1 | -6.2 |
| 16/05/2019 | 6.4 | 40100 | 433 | n.d. | 19280 | 68 | 2657 | 11173 | 405 | 425 | 1312 | 6.0·10-2 | -6.3 |
| 21/05/2019 | 6.4 | 41600 | 438 | n.d. | 19230 | 68 | 2651 | 11181 | 412 | 422 | 1318 | 6.2·10-2 | -2.3 |
| 27/05/2019 | 6.5 | 41500 | 433 | n.d. | 19324 | 66 | 2663 | 11189 | 411 | 414 | 1290 | 9.4·10-2 | -5.1 |
| 04/06/2019 | 6.5 | 43300 | 460 | n.d. | 19480 | 68 | 2532 | 11097 | 416 | 416 | 1305 | 7.1·10-2 | n.d. |
| 11/06/2019 | 6.3 | n.d. | 468 | n.d. | 19842 | 70 | 2578 | 11088 | 411 | 419 | 1312 | 1.1·10-1 | n.d. |
| 13/06/2019 | 6.3 | n.d. | 481 | n.d. | 19210 | 68 | 2513 | 11343 | 421 | 442 | 1341 | 1.2·10-1 | n.d. |
| 18/06/2019 | 6.3 | 40600 | 485 | n.d. | 19478 | 66 | 2542 | 11277 | 420 | 406 | 1304 | 1.6·10-1 | n.d. |
| 20/06/2019 | 6.3 | 40500 | 464 | n.d. | 19940 | 72 | 2603 | 11420 | 422 | 433 | 1345 | 1.5·10-1 | -6.1 |
| 25/06/2019 | 6.2 | 40700 | 716 | n.d. | 19992 | 67 | 2605 | 11033 | 409 | 410 | 1289 | 1.3·10-1 | n.d. |
| 27/06/2019 | 6.4 | 43400 | 520 | n.d. | 20486 | 66 | 2531 | 11124 | 409 | 428 | 1312 | 1.2·10-1 | -5.1 |
| 02/07/2019 | 6.3 | 40000 | 540 | n.d. | 18921 | 64 | 2480 | 10964 | 410 | 414 | 1295 | 6.2·10-2 | -5.3 |
| 04/07/2019 | 6.2 | 40300 | 528 | n.d. | 18858 | 66 | 2479 | 11151 | 410 | 419 | 1309 | 7.2·10-2 | -6.0 |
| 09/07/2019 | 6.4 | 40800 | 531 | n.d. | 19355 | 66 | 2534 | 11184 | 416 | 411 | 1304 | 1.0·10-1 | n.d. |
| 11/07/2019 | 6.3 | 40500 | 531 | n.d. | 19169 | 66 | 2517 | 11204 | 422 | 427 | 1315 | 1.2·10-1 | n.d. |
| 16/07/2019 | 6.2 | 39500 | 548 | n.d. | 18851 | 67 | 2467 | 11219 | 418 | 408 | 1297 | 1.3·10-1 | -6.3 |
| 23/07/2019 | 7.0 | 40900 | 503 | n.d. | 19184 | 66 | 2607 | 10822 | 405 | 397 | 1266 | 3.4·10-2 | -6.2 |
| 25/07/2019 | 7.1 | 41100 | 508 | n.d. | 18979 | 66 | 2598 | 10807 | 400 | 394 | 1249 | 2.0·10-2 | n.d. |
| 30/07/2019 | 6.3 | 42500 | 578 | n.d. | 18046 | 63 | 2681 | 10715 | 421 | 414 | 1254 | 1.4·10-1 | -6.1 |
| 01/08/2019 | 6.3 | 42600 | 568 | n.d. | 18873 | 65 | 2484 | 11033 | 409 | 410 | 1289 | n.d. | -6.2 |
| 06/08/2019 | 6.5 | 41400 | 550 | n.d. | n.d. | n.d. | n.d. | 10851 | 410 | 406 | 1264 | 8.7·10-2 | -5.0 |
| 08/08/2019 | 6.4 | 41600 | 550 | n.d. | 18460 | 64 | 2583 | 10861 | 404 | 405 | 1280 | 1.2·10-1 | -4.9 |
| 13/08/2019 | 6.3 | 40500 | 581 | n.d. | 14183 | 37 | 8455 | 10762 | 417 | 404 | 1257 | 1.4·10-1 | -6.5 |
| 15/08/2019 | 6.4 | 40400 | 576 | n.d. | 17559 | 58 | 2397 | 10823 | 406 | 439 | 1295 | 1.1·10-1 | -6.2 |
| 20/08/2019 | 6.3 | 40400 | 566 | n.d. | 20123 | 63 | 2717 | 10607 | 392 | 395 | 1228 | 9.1·10-2 | -4.7 |
| 22/08/2019 | 6.3 | 40000 | 568 | n.d. | 17835 | 54 | 2436 | 10814 | 410 | 406 | 1274 | 7.2·10-2 | -4.7 |
| 27/08/2019 | 6.4 | 39900 | 594 | n.d. | 20549 | 63 | 2780 | 10602 | 401 | 406 | 1264 | 1.5·10-1 | -5.0 |
| 29/08/2019 | 6.4 | 40000 | 585 | n.d. | 17262 | 53 | 2363 | 10783 | 402 | 403 | 1236 | 1.6·10-1 | -5.0 |
| 03/09/2019 | 6.4 | 40000 | 552 | n.d. | 18547 | 56 | 2523 | 10993 | 410 | 411 | 1273 | 1.4·10-1 | -5.6 |
| 10/09/2019 | 6.3 | 41000 | 610 | n.d. | 18434 | 55 | 2451 | 10524 | 409 | 380 | 1222 | 1.8·10-1 | -4.0 |
| 17/09/2019 | 6.3 | 40700 | 605 | n.d. | 18547 | 57 | 2424 | 10589 | 411 | 381 | 1225 | 2.1·10-1 | -4.7 |
| 24/09/2019 | 6.3 | 40200 | 628 | n.d. | 18392 | 57 | 2400 | 10322 | 404 | 372 | 1203 | 1.8·10-1 | -5.4 |
| 01/10/2019 | 6.3 | 39900 | 613 | n.d. | 18837 | 63 | 2483 | 11191 | 423 | 419 | 1314 | 9.7·10-2 | -5.0 |
| 07/10/2019 | 6.2 | 40100 | 605 | n.d. | 19066 | 65 | 2500 | 11258 | 418 | 404 | 1306 | 1.3·10-1 | -4.7 |
| 15/10/2019 | 6.3 | 40500 | 593 | n.d. | 19899 | 69 | 2607 | 11361 | 426 | 405 | 1316 | 1.8·10-1 | -4.3 |
| 22/10/2019 | 6.3 | 40700 | 603 | n.d. | 17535 | 54 | 2455 | 11136 | 419 | 417 | 1332 | 7.1·10-2 | -5.0 |
| 27/10/2019 | 6.3 | 40400 | 612 | n.d. | 18656 | 54 | 2408 | 10902 | 411 | 409 | 1285 | 7.6·10-2 | -5.0 |
| 05/11/2019 | 6.4 | 40800 | 627 | n.d. | 23641 | 72 | 3083 | 10877 | 413 | 412 | 1302 | 8.7·10-2 | -5.2 |
| 12/11/2019 | 6.4 | 40900 | 606 | n.d. | 19023 | 57 | 2453 | 11072 | 415 | 390 | 1302 | 1.2·10-1 | -5.0 |
| 19/11/2019 | 6.6 | 40300 | 558 | n.d. | 18887 | 60 | 2614 | 10958 | 417 | 397 | 1289 | 1.2·10-1 | -4.9 |
| 25/11/2019 | 6.4 | 40600 | 602 | n.d. | 18827 | 60 | 2611 | 11308 | 422 | 400 | 1276 | 8.9·10-2 | -4.1 |
| 03/12/2019 | 6.4 | 41500 | 596 | n.d. | 18903 | 61 | 2617 | 10925 | 406 | 406 | 1262 | 1.3·10-1 | -5.0 |
| 10/12/2019 | 6.4 | 41000 | 593 | n.d. | 18856 | 60 | 2612 | 10820 | 412 | 408 | 1278 | 9.7·10-2 | -5.0 |
| 17/12/2019 | 6.6 | 41100 | 553 | n.d. | 18987 | 61 | 2631 | 10861 | 411 | 390 | 1312 | 8.9·10-2 | -4.5 |
| 23/12/2019 | 6.6 | 37600 | 518 | n.d. | 18406 | 59 | 2541 | 11048 | 411 | 391 | 1306 | 6.3·10-2 | -3.8 |
| 30/12/2019 | 6.4 | 39500 | 529 | n.d. | 18873 | 60 | 2608 | 11088 | 427 | 402 | 1291 | 1.1·10-1 | -4.9 |
| 08/01/2020 | 6.2 | 41200 | 534 | n.d. | 18941 | 62 | 2615 | 10828 | 409 | 415 | 1282 | 1.8·10-1 | -4.9 |
| 13/01/2020 | 6.4 | 41400 | 500 | n.d. | 18196 | 58 | 2518 | 11042 | 421 | 407 | 1293 | 1.2·10-1 | -4.9 |
| 21/01/2020 | 6.4 | 39800 | 472 | n.d. | 18135 | 58 | 2505 | 11177 | 410 | 409 | 1287 | 1.4·10-1 | -4.2 |
| 27/01/2020 | 6.4 | 40900 | 450 | n.d. | 19151 | 64 | 2461 | 10945 | 410 | 410 | 1301 | 8.4·10-2 | -4.5 |
| 03/02/2020 | 6.4 | 41100 | 450 | n.d. | 19181 | 65 | 2460 | 10956 | 431 | 411 | 1289 | 9.2·10-2 | -5.1 |
| 10/02/2020 | 6.4 | 40900 | 462 | n.d. | 18670 | 63 | 2393 | 11069 | 407 | 398 | 1273 | 1.3·10-1 | -5.1 |
| 17/02/2020 | 6.3 | 41300 | 437 | n.d. | 19251 | 65 | 2463 | 11029 | 410 | 415 | 1298 | 8.8·10-2 | -4.8 |
| 02/03/2020 | 6.4 | 40700 | 388 | n.d. | 19173 | 67 | 2597 | 10957 | 403 | 410 | 1332 | 9.2·10-2 | -4.3 |
| 09/03/2020 | 6.4 | 40200 | 401 | n.d. | 18597 | 64 | 2556 | 10839 | 398 | 410 | 1283 | 8.2·10-2 | -2.7 |
| 23/07/2020 | 6.4 | 42300 | 565 | n.d. | 18597 | 66 | 2438 | 10508 | 390 | 374 | 1211 | 1.4·10-1 | -5.1 |
| 28/07/2020 | 6.3 | 42800 | 544 | n.d. | 18858 | 64 | 2474 | 10768 | 397 | 398 | 1275 | 1.2·10-1 | -5.0 |
| 30/07/2020 | 6.4 | 42400 | 546 | n.d. | 18584 | 64 | 2443 | 10705 | 395 | 394 | 1256 | 1.1·10-1 | -4.6 |
| 04/08/2020 | 6.3 | 42800 | 585 | n.d. | 18440 | 66 | 2416 | 10778 | 395 | 384 | 1239 | 1.4·10-1 | -4.6 |
| 07/08/2020 | 6.3 | 43000 | 567 | n.d. | 18714 | 64 | 2450 | 10192 | 371 | 366 | 1174 | 1.5·10-1 | -5.0 |
| 11/08/2020 | 6.3 | 42400 | 553 | n.d. | 18689 | 64 | 2443 | 10492 | 376 | 391 | 1202 | 1.3·10-1 | -5.1 |
| 13/08/2020 | 6.3 | 42600 | 597 | n.d. | 18505 | 62 | 2430 | 10554 | 397 | 383 | 1222 | 1.8·10-1 | -5.6 |
| 18/08/2020 | 6.3 | 42000 | 609 | n.d. | 18489 | 61 | 2410 | 10545 | 384 | 371 | 1206 | 1.4·10-1 | -5.4 |
| 20/08/2020 | 6.4 | 42000 | 582 | n.d. | 18117 | 62 | 2366 | 10524 | 380 | 368 | 1197 | 2.1·10-1 | -5.4 |
| 25/08/2020 | 6.3 | 42800 | 595 | n.d. | 18608 | 64 | 2443 | 10540 | 385 | 371 | 1194 | 1.5·10-1 | -4.9 |
| 27/08/2020 | 6.3 | 42700 | 591 | n.d. | 18509 | 64 | 2436 | 10519 | 383 | 370 | 1204 | 1.3·10-1 | -3.3 |
| 01/09/2020 | 6.3 | 42900 | 621 | n.d. | 18574 | 67 | 2431 | 10351 | 381 | 377 | 1173 | 1.3·10-1 | -5.5 |
| 03/09/2020 | 6.4 | 43100 | 561 | n.d. | 18516 | 65 | 2436 | 10395 | 378 | 365 | 1184 | 1.7·10-1 | -5.4 |
| 08/09/2020 | 6.2 | 41800 | 606 | n.d. | 18602 | 68 | 2445 | 10494 | 379 | 362 | 1195 | 1.4·10-1 | -5.1 |
| 10/09/2020 | 6.3 | 46800 | 622 | n.d. | 18388 | 64 | 2423 | 10524 | 378 | 371 | 1212 | 2.3·10-1 | -5.5 |
| 14/09/2020 | 6.2 | 41900 | 639 | n.d. | 18633 | 63 | 2528 | 10747 | 392 | 380 | 1226 | 1.7·10-1 | -2.9 |
| 17/09/2020 | 6.3 | 42200 | 633 | n.d. | 18518 | 65 | 2513 | 10556 | 381 | 384 | 1206 | 1.7·10-1 | -5.4 |
| 22/09/2020 | 6.4 | 43300 | 610 | n.d. | 19085 | 66 | 2586 | 10738 | 395 | 371 | 1234 | 1.4·10-1 | -5.7 |
| 24/09/2020 | 6.2 | 42800 | 597 | n.d. | 18743 | 64 | 2540 | 10638 | 389 | 378 | 1242 | 1.8·10-1 | -5.6 |
| 29/09/2020 | 6.4 | 41800 | 549 | n.d. | 18690 | 63 | 2533 | 10644 | 388 | 378 | 1227 | 1.3·10-1 | -5.4 |
| 01/10/2020 | 6.3 | 42000 | 540 | n.d. | 18688 | 62 | 2543 | 10550 | 389 | 375 | 1215 | 1.6·10-1 | -5.6 |
| 06/10/2020 | 6.3 | 41800 | 603 | n.d. | 18550 | 62 | 2520 | 10411 | 376 | 363 | 1185 | 1.2·10-1 | -5.1 |
| 08/10/2020 | 6.4 | 42000 | 601 | n.d. | 18670 | 62 | 2529 | 10411 | 379 | 393 | 1205 | 8.0·10-2 | -4.4 |
| 13/10/2020 | 6.3 | 42200 | 624 | n.d. | 18587 | 65 | 2526 | 10351 | 380 | 366 | 1188 | 1.4·10-1 | -4.0 |
| 15/10/2020 | 6.3 | 42400 | 619 | n.d. | 18702 | 66 | 2539 | 10448 | 386 | 364 | 1200 | 1.6·10-1 | -5.1 |
| 20/10/2020 | 6.4 | 42100 | 587 | n.d. | 18730 | 62 | 2546 | 10304 | 378 | 363 | 1183 | 1.0·10-1 | -5.4 |
| 22/10/2020 | 6.5 | 42200 | 575 | n.d. | 18713 | 60 | 2547 | 10541 | 387 | 369 | 1204 | 9.5·10-2 | -4.6 |
| 26/10/2020 | 6.4 | 43400 | 600 | n.d. | 18835 | 61 | 2554 | 10526 | 393 | 387 | 1184 | 9.8·10-2 | -5.3 |
| 29/10/2020 | 6.4 | 42300 | 603 | n.d. | 18645 | 50 | 2520 | 10527 | 386 | 379 | 1173 | 1.2·10-1 | -5.0 |
| 03/11/2020 | 6.3 | 42800 | 603 | n.d. | 18901 | 60 | 2543 | 10481 | 383 | 377 | 1207 | 1.4·10-1 | -5.0 |
| 06/11/2020 | 6.4 | 42700 | 588 | n.d. | 18677 | 60 | 2534 | 10494 | 385 | 359 | 1199 | 1.1·10-1 | -3.6 |
| 10/11/2020 | 6.4 | 42700 | 593 | n.d. | 18718 | 58 | 2539 | 10585 | 389 | 377 | 1205 | 1.2·10-1 | -5.4 |
| 12/11/2020 | 6.4 | 42500 | 603 | n.d. | 18667 | 58 | 2522 | 10507 | 376 | 367 | 1204 | 1.2·10-1 | -5.5 |
| 17/11/2020 | 6.7 | 43800 | 585 | n.d. | 18925 | 59 | 2559 | 10551 | 389 | 373 | 1201 | 7.6·10-2 | -5.2 |
| 19/11/2020 | 6.5 | 43400 | 569 | n.d. | 18729 | 59 | 2550 | 10280 | 380 | 363 | 1185 | 1.2·10-1 | -5.4 |
| 24/11/2020 | 6.4 | 43800 | 596 | n.d. | 18859 | 61 | 2586 | 10527 | 393 | 381 | 1192 | 1.1·10-1 | -5.6 |
| 26/11/2020 | 6.4 | 43100 | 610 | n.d. | 18777 | 60 | 2551 | 10427 | 384 | 393 | 1234 | 1.1·10-1 | -5.5 |
| 01/12/2020 | 6.7 | 42400 | 570 | n.d. | 18850 | 61 | 2562 | 10573 | 397 | 389 | 1260 | 5.7·10-2 | -4.7 |
| 03/12/2020 | 7.0 | 23720 | n.d. | n.d. | n.d. | n.d. | n.d. | n.d. | n.d. | n.d. | n.d. | 4.1·10-2 | -6.0 |
| 09/12/2020 | 6.5 | 42800 | 553 | n.d. | 18835 | 63 | 2579 | 10577 | 393 | 395 | 1259 | 1.1·10-1 | -3.8 |
| 16/12/2020 | 6.5 | 43600 | 547 | n.d. | 18767 | 63 | 2612 | 10774 | 398 | 393 | 1278 | 1.2·10-1 | -5.4 |
| 18/12/2020 | 6.6 | 43400 | 539 | n.d. | 18850 | 60 | 2576 | 10740 | 401 | 386 | 1270 | 6.9·10-2 | 0.5 |
| 21/12/2020 | 6.6 | 40300 | 528 | n.d. | 19079 | 62 | 2604 | 10725 | 395 | 404 | 1275 | 1.0·10-1 | -5.2 |
| 28/12/2020 | 6.6 | 42700 | 576 | n.d. | 18867 | 60 | 2595 | 10770 | 402 | 395 | 1286 | 1.1·10-1 | -5.5 |
| 12/01/2021 | 6.5 | 43100 | 506 | n.d. | 18925 | 61 | 2571 | 10897 | 406 | 398 | 1303 | 1.1·10-1 | -5.7 |
| 27/01/2021 | 6.4 | 43700 | 469 | n.d. | 19031 | 61 | 2602 | 10842 | 403 | 396 | 1288 | 9.6·10-2 | -4.7 |
| 12/03/2021 | 6.5 | 44300 | 401 | n.d. | 16290 | 51 | 2062 | 10958 | 402 | 391 | 1273 | 9.7·10-2 | -5.1 |
| 15/03/2021 | 7.1 | 44700 | 424 | n.d. | 15622 | 46 | 1978 | 10859 | 401 | 393 | 1261 | 3.9·10-2 | -4.9 |
| 14/04/2021 | 6.4 | 45300 | 403 | n.d. | 18814 | 66 | 2381 | 10943 | 406 | 401 | 1280 | n.d. | -1.8 |
| 19/05/2021 | 6.4 | 44500 | 451 | n.d. | 18975 | 64 | 2491 | 11311 | 424 | 421 | 1323 | 7.6·10-2 | -2.5 |
| 02/07/2021 | 6.4 | 43700 | 513 | n.d. | 19847 | 60 | 2387 | 10448 | 390 | 391 | 1227 | n.d. | -4.9 |
| 05/07/2021 | 6.4 | 43400 | 540 | n.d. | 19836 | 62 | 2402 | 10462 | 394 | 389 | 1225 | 1.3·10-1 | -5.0 |
| 20/07/2021 | 6.3 | 43300 | 593 | n.d. | 19376 | 60 | 2596 | 10686 | 396 | 395 | 1299 | 1.2·10-1 | -4.1 |
| 26/08/2021 | 6.7 | 42900 | 603 | n.d. | 19147 | 63 | 2563 | 10708 | 389 | 400 | 1306 | 9.6·10-2 | -6.5 |
| 15/09/2021 | 6.4 | 40200 | 600 | n.d. | 18259 | 58 | 2425 | 11378 | 417 | 413 | 1389 | n.d. | -7.1 |
| 18/09/2021 | 6.3 | 43500 | 617 | n.d. | 18808 | 58 | 2497 | 10676 | 390 | 404 | 1302 | 2.4·10-1 | -4.6 |
| 20/09/2021 | 6.3 | 42600 | 609 | n.d. | 18969 | 57 | 2524 | 10760 | 394 | 407 | 1313 | 2.1·10-1 | -7.3 |
| 22/09/2021 | 6.3 | 43800 | 604 | n.d. | 18718 | 60 | 2498 | 10760 | 398 | 401 | 1309 | 1.8·10-1 | -6.1 |
| 24/09/2021 | 6.2 | 42400 | 606 | n.d. | 18869 | 60 | 2531 | 10700 | 391 | 401 | 1310 | 2.5·10-1 | -6.2 |
| 27/09/2021 | 6.2 | 42100 | 604 | n.d. | 18866 | 60 | 2551 | 10737 | 396 | 404 | 1314 | 2.1·10-1 | -5.5 |
| 29/09/2021 | 6.3 | 42100 | 618 | n.d. | 18787 | 56 | 2448 | 10760 | 387 | 403 | 1310 | 2.5·10-1 | -6.3 |
| 01/10/2021 | 6.3 | 41900 | 614 | n.d. | 18821 | 56 | 2453 | 10841 | 395 | 408 | 1319 | 2.0·10-1 | -6.1 |
| 05/10/2021 | 6.5 | 41900 | 604 | n.d. | 18746 | 60 | 2535 | 10575 | 387 | 395 | 1294 | 1.5·10-1 | -5.0 |
| 08/10/2021 | 6.3 | 42400 | 583 | n.d. | 18373 | 64 | 2566 | 10609 | 388 | 393 | 1299 | 1.7·10-1 | -5.9 |
| 11/10/2021 | 6.4 | 42600 | 590 | n.d. | 18229 | 66 | 2530 | 10663 | 388 | 396 | 1306 | 1.7·10-1 | -5.2 |
| 13/10/2021 | 6.4 | 42700 | 585 | n.d. | 18322 | 60 | 2525 | 10629 | 388 | 387 | 1301 | 1.3·10-1 | -5.7 |
| 15/10/2021 | 6.2 | 43300 | 586 | n.d. | 18697 | 54 | 2531 | 10545 | 403 | 512 | 1313 | 3.6·10-1 | -6.5 |
| 18/10/2021 | 6.2 | 43300 | 588 | n.d. | 18692 | 54 | 2534 | 10629 | 409 | 379 | 1300 | 3.7·10-1 | -6.1 |
| 20/10/2021 | 6.2 | 43400 | 586 | n.d. | 18784 | 55 | 2546 | 10586 | 362 | 421 | 1287 | 4.0·10-1 | -6.1 |
| 22/10/2021 | 6.4 | 42800 | 578 | n.d. | 18791 | 55 | 2535 | 10709 | 374 | 406 | 1341 | 2.3·10-1 | -6.2 |
| 25/10/2021 | 6.4 | 42700 | 568 | n.d. | 18720 | 61 | 2521 | 10687 | 366 | 434 | 1324 | 1.5·10-1 | -6.1 |
| 27/10/2021 | 6.3 | 42700 | 571 | n.d. | 18849 | 59 | 2547 | 10821 | 381 | 418 | 1341 | 1.8·10-1 | -5.7 |
| 29/10/2021 | 6.5 | 42100 | 598 | n.d. | 18758 | 53 | 2531 | 10741 | 370 | 456 | 1360 | 1.4·10-1 | -5.5 |
| 01/11/2021 | 6.5 | 42000 | 617 | n.d. | 18696 | 52 | 2533 | 10691 | 367 | 422 | 1296 | 1.3·10-1 | -5.6 |
| 04/11/2021 | 6.4 | 42000 | 606 | n.d. | 18763 | 51 | 2542 | 10732 | 361 | 412 | 1315 | 1.8·10-1 | -5.8 |
| 06/11/2021 | 6.3 | 41800 | 581 | n.d. | 19171 | 57 | 2578 | 10737 | 361 | 400 | 1329 | 2.3·10-1 | -5.4 |
| 09/11/2021 | 6.4 | 43300 | 586 | n.d. | 18769 | 54 | 2555 | 10747 | 377 | 406 | 1331 | 1.9·10-1 | -5.2 |
| 11/11/2021 | 6.4 | 42300 | 593 | n.d. | 18756 | 55 | 2535 | 10835 | 381 | 506 | 1348 | 1.7·10-1 | -5.7 |
| 13/11/2021 | 6.4 | 42800 | 599 | n.d. | 18843 | 53 | 2550 | 10506 | 327 | 407 | 1321 | 1.8·10-1 | -5.8 |
| 15/11/2021 | 6.3 | 42600 | 605 | n.d. | 18514 | 52 | 2505 | 10434 | 356 | 393 | 1287 | 2.5·10-1 | -6.0 |
| 17/11/2021 | 6.5 | 42600 | 613 | n.d. | 18607 | 51 | 2518 | 10439 | 332 | 416 | 1297 | 1.8·10-1 | -5.9 |
| 19/11/2021 | 6.3 | 42200 | 589 | n.d. | 18754 | 59 | 2516 | 10556 | 354 | 422 | 1305 | 2.0·10-1 | -5.3 |
| 22/11/2021 | 6.4 | 42300 | 595 | n.d. | 18539 | 60 | 2506 | 10451 | 374 | 396 | 1291 | 1.9·10-1 | -5.5 |
| 24/11/2021 | 6.3 | 41900 | 593 | n.d. | 18529 | 59 | 2510 | 10425 | 347 | 408 | 1310 | 2.2·10-1 | -5.4 |
| 27/11/2021 | 6.3 | 43000 | 609 | n.d. | 17822 | 57 | 2413 | 10079 | 342 | 509 | 1265 | 1.1·10-1 | -5.2 |
| 29/11/2021 | 6.2 | 42900 | 604 | n.d. | 17884 | 55 | 2422 | 10047 | 351 | 491 | 1263 | 1.4·10-1 | -2.0 |
| 30/11/2021 | 6.3 | 43300 | 607 | n.d. | 18148 | 54 | 2471 | 10381 | 419 | 628 | 1327 | 1.7·10-1 | -5.0 |
| 03/12/2021 | 6.2 | 43200 | 604 | n.d. | 18358 | 50 | 2500 | 10250 | 301 | 486 | 1255 | 1.8·10-1 | -5.0 |
| 06/12/2021 | 6.4 | 43500 | 563 | n.d. | 18654 | 50 | 2547 | 10460 | 332 | 452 | 1322 | 1.2·10-1 | -4.9 |
| 08/12/2021 | 6.4 | 43700 | 546 | n.d. | 18587 | 58 | 2560 | 10643 | 363 | 548 | 1330 | 8.4·10-2 | -4.7 |
| 11/12/2021 | 6.4 | 44400 | 541 | n.d. | 18646 | 56 | 2543 | 11306 | 379 | 423 | 1290 | 1.0·10-1 | -4.6 |
| 13/12/2021 | 6.5 | 44600 | 527 | n.d. | 18650 | 58 | 2520 | 10515 | 326 | 434 | 1310 | 9.5·10-2 | -4.0 |
| 15/12/2021 | 6.7 | 44400 | 518 | n.d. | 18640 | 52 | 2554 | 10485 | 387 | 492 | 1321 | 9.0·10-2 | -4.0 |
| 17/12/2021 | 6.6 | 44100 | 525 | n.d. | 18733 | 56 | 2524 | 10461 | 328 | 461 | 1293 | 7.2·10-2 | -4.3 |
| 20/12/2021 | 6.6 | 44300 | 509 | n.d. | 18968 | 56 | 2569 | 10627 | 425 | 530 | 1332 | 8.1·10-2 | -4.7 |
| 22/12/2021 | 6.6 | 41900 | 516 | n.d. | 18913 | 49 | 2597 | 10355 | 341 | 454 | 1304 | 1.1·10-1 | -5.6 |
| 27/12/2021 | 6.6 | 42100 | 526 | n.d. | 18873 | 49 | 2585 | 10272 | 315 | 506 | 1279 | 7.8·10-2 | -5.2 |
| 30/12/2021 | 6.5 | 42100 | 528 | n.d. | 18933 | 46 | 2595 | 10413 | 362 | 596 | 1331 | 9.1·10-2 | -5.6 |
| 05/01/2022 | 6.4 | 42700 | 515 | n.d. | 18899 | 43 | 2565 | 10467 | 383 | 519 | 1337 | 1.1·10-1 | -0.9 |
| 08/01/2022 | 6.5 | 42700 | 511 | n.d. | 18990 | 50 | 2580 | 10528 | 351 | 496 | 1310 | 8.0·10-2 | -5.6 |
| 10/01/2022 | 6.5 | 42800 | 497 | n.d. | 19027 | 47 | 2577 | 10639 | 367 | 506 | 1322 | 8.9·10-2 | -4.8 |
| 12/01/2022 | 6.6 | 42900 | 514 | n.d. | 19076 | 45 | 2591 | 10580 | 404 | 490 | 1315 | 7.1·10-2 | -5.3 |
| 14/01/2022 | 6.6 | 43100 | 528 | n.d. | 18804 | 49 | 2529 | 10588 | 334 | 478 | 1318 | 7.0·10-2 | -5.8 |
| 18/01/2022 | 6.5 | 42300 | 525 | n.d. | 18946 | 57 | 2559 | 10461 | 353 | 553 | 1299 | 9.7·10-2 | -5.1 |
| 20/01/2022 | 6.5 | 42600 | 508 | n.d. | 19045 | 60 | 2584 | 10534 | 341 | 500 | 1351 | 1.2·10-1 | -5.1 |
| 25/01/2022 | 6.4 | 42600 | 497 | n.d. | 18775 | 56 | 2593 | 10464 | 358 | 436 | 1286 | 7.4·10-2 | -5.1 |
| 28/01/2022 | 6.4 | 42000 | 507 | n.d. | 18459 | 56 | 2551 | 10428 | 354 | 423 | 1305 | 7.5·10-2 | -5.2 |
| 03/02/2022 | 6.6 | 42100 | 469 | n.d. | 18763 | 48 | 2491 | 10841 | 404 | 445 | 1292 | n.d. | -5.1 |
| 08/02/2022 | 6.4 | 42100 | 471 | n.d. | 18766 | 52 | 2508 | 10641 | 384 | 433 | 1263 | n.d. | -5.1 |
| 11/02/2022 | 6.4 | 41900 | 500 | n.d. | 18621 | 51 | 2494 | 10563 | 396 | 437 | 1285 | 4.4·10-2 | -5.4 |
| 15/02/2022 | 6.6 | 43200 | 534 | n.d. | 18510 | 58 | 2498 | 10329 | 359 | 375 | 1247 | 8.2·10-2 | -5.6 |
| 17/02/2022 | 6.7 | 43200 | 524 | n.d. | 18292 | 56 | 2464 | 10330 | 356 | 369 | 1303 | 8.9·10-2 | -5.5 |
| 22/02/2022 | 6.6 | 43700 | 436 | n.d. | 18699 | 58 | 2504 | 10512 | 370 | 410 | 1251 | 7.2·10-2 | -0.9 |
| 24/02/2022 | 6.6 | 43100 | 524 | n.d. | 18234 | 56 | 2441 | 10339 | 360 | 369 | 1233 | 9.0·10-2 | -4.2 |
| 01/03/2022 | 6.8 | 42200 | 470 | n.d. | 18664 | 61 | 2512 | 10138 | 412 | 442 | 1232 | 5.2·10-2 | -5.1 |
| 03/03/2022 | 6.7 | 41600 | 500 | n.d. | 18555 | 61 | 2519 | 10509 | 360 | 401 | 1273 | 8.3·10-2 | -5.2 |
| 08/03/2022 | 6.5 | 44100 | 439 | n.d. | 18776 | 66 | 2553 | 10617 | 393 | 436 | 1244 | 1.1·10-1 | -4.8 |
| 10/03/2022 | 6.6 | 44200 | 451 | n.d. | 18754 | 66 | 2540 | 10613 | 410 | 440 | 1296 | 1.2·10-1 | -5.1 |
| 14/03/2022 | 6.5 | 43400 | 401 | n.d. | 18432 | 60 | 2432 | 10639 | 394 | 386 | 1281 | 1.0·10-1 | -5.3 |
| 17/03/2022 | 6.5 | 43000 | 457 | n.d. | 18457 | 59 | 2446 | 10551 | 409 | 435 | 1324 | 1.1·10-1 | -4.3 |
| 21/03/2022 | 6.6 | 42000 | 438 | n.d. | 18287 | 61 | 2471 | 12820 | 527 | 482 | 1468 | 7.7·10-2 | -4.8 |
| 23/03/2022 | 6.6 | 41300 | 361 | n.d. | 18791 | 63 | 2525 | 10803 | 413 | 363 | 1241 | 6.4·10-2 | -5.0 |
| 25/03/2022 | 6.6 | 42300 | 389 | n.d. | 16792 | 57 | 2261 | 10822 | 499 | 405 | 1312 | 6.0·10-2 | -4.8 |
| 28/03/2022 | 6.4 | 43900 | 383 | n.d. | 18879 | 64 | 2545 | 10553 | 389 | 403 | 1282 | 1.2·10-1 | n.d. |
| 30/03/2022 | 6.6 | 40200 | 370 | n.d. | 19030 | 67 | 2562 | 10792 | 379 | 409 | 1270 | 1.5·10-1 | n.d. |

n.d.: No data.
